# Supplementary material for: Rostrum size differences between Toarcian belemnite battlefields
Source: Copernicus journal article supplement (doi:10.5194/fr-21-171-2018), 2018-06-07
Supplement: Supplementary file 1 [file fr-21-171-2018-supplement.zip]

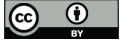

## *Supplement of*

# **Rostrum size differences between Toarcian belemnite battlefields**

**Patrícia Rita et al.**

*Correspondence to:* Patrícia Rita ([patricia.rita@fau.de](mailto:patricia.rita@fau.de))

- [fr-21-171-2018-supplement-title-page.pdf](#)
- [supplementary material.xlsx](#)

The copyright of individual parts of the supplement might differ from the CC BY 4.0 License.
