# Supplementary material for: Rostrum size differences between Toarcian belemnite battlefields
Source: Copernicus journal article supplement (doi:10.5194/fr-21-171-2018), 2018-06-07
Supplement: Supplementary file 2 [file fr-21-171-2018-supplement.zip]

Archive with 2 entries (2 files):
- fr-21-171-2018-supplement-title-page.pdf
- supplementary material.xlsx
