# Supplementary material for: Rostrum size differences between Toarcian belemnite battlefields
Source: Copernicus journal article supplement (doi:10.5194/fr-21-171-2018), 2018-06-07
Supplement: Supplementary file 2 [file fr-21-171-2018-supplement.zip › supplementary material.xlsx]

## Sheet: Table S3 - Schlegelmilch data
Subfamily	genus	species	Age	biozone	L	lp (l)	hp (Dv)	H (Dv/X)	bp (Dl)	Q (Ic)	hm	F	E	a	rs	volume elliptical cone		Geometric mean
Passaloteuthididae	Schwegleria	feifeli	hettangian	he 2a	16.6	10.6	4.24	0.4	4.41667	0.96						207.872	198.503	5.8334
Passaloteuthididae	Schwegleria	feifeli	hettangian	he 2a	23.5	16	4.96	0.31									0	0
Passaloteuthididae	Schwegleria	praecox	hettangian	he 2a	13.7	9.7	3.686	0.38	3.38165	1.09						126.615	120.908	4.94484
Passaloteuthididae	Schwegleria	praecox	hettangian	he 2a		18.5	5	0.27027	5	1						484.329	462.5	7.7334
Passaloteuthididae	Schwegleria	psilonoti	hettangian	he 2a		16	3.7	0.23125	3.66337	1.01						227.107	216.871	6.00806
Passaloteuthididae	Schwegleria	psilonoti	hettangian	he 2a	10.8	9.6	3.168	0.33	3.23265	0.98						102.954	98.314	4.61536
Passaloteuthididae	Nannobelus	acutus	sinemurian - pliensbachian	si 1; he 2b?; pb1a?	35	20	5.4	0.27									0	0
Passaloteuthididae	Nannobelus	acutus	sinemurian - pliensbachian	si 1; he 2b?; pb1a?	43	16	6.72	0.42	6.33962	1.06						713.808	681.636	8.80071
Passaloteuthididae	Nannobelus	acutus	sinemurian - pliensbachian	si 1; he 2b?; pb1a?	39	20	8	0.4	7.84314	1.02						1314.13	1254.9	10.7862
Passaloteuthididae	Nannobelus	acutus	sinemurian - pliensbachian	si 1; he 2b?; pb1a?	65	33	10.89	0.33	9.075	1.2						3415.21	3261.28	14.8296
Passaloteuthididae	Nannobelus	oppeli	sinemurian	si 1b?; si 2	30	30	9.6	0.32	8.57143	1.12						2585.08	2468.57	13.515
Passaloteuthididae	Nannobelus	oppeli	sinemurian	si 1b?; si 2	79.8	35	13.65	0.39	11.375	1.2						5690.9	5434.41	17.5813
Passaloteuthididae	Nannobelus	werneri	sinemurian-pliensbachian	si 2d; pb 1a	81	37	8.88	0.24	8.70588	1.02						2995.41	2860.4	14.1952
Passaloteuthididae	Nannobelus	werneri	sinemurian-pliensbachian	si 2d; pb 1a	55	36	7.2	0.2									0	0
Passaloteuthididae	Coeloteuthis	excavata	pliensbachian	pb1	39	7	10.5	1.5	9.05172	1.16						696.702	665.302	8.72984
Passaloteuthididae	Coeloteuthis	calcar	sinemurian - pliensbachian	si1b-pb1		32	18	0.5625	16.3636	1.1		0.65				9870.31	9425.45	21.1236
Passaloteuthididae	Coeloteuthis	calcar	sinemurian - pliensbachian	si1b-pb1	42	5	7	1.4					20	25	1.7		0	0
Passaloteuthididae	Coeloteuthis	calcar	sinemurian - pliensbachian	si1b-pb1	30	3	5.1	1.7	4.63636	1.1					1.5	74.2844	70.9364	4.13958
Passaloteuthididae	Coeloteuthis	cuneolus	sinemurian - pliensbachian	si2-pb1		31	15	0.483871	15	1		0.5				7304.2	6975	19.1065
Passaloteuthididae	Coeloteuthis	cuneolus	sinemurian - pliensbachian	si2-pb1	39	20											0	0
Passaloteuthididae	Coeloteuthis	cuneolus	sinemurian - pliensbachian	si2-pb1		28	13	0.464286	13	1		0.5				4955.34	4732	16.7886
Passaloteuthididae	Coeloteuthis	palliata	pliensbachian	pb1c-pb2a		36	13	0.361111	12.5	1.04				26		6126.11	5850	18.0185
Passaloteuthididae	Coeloteuthis	palliata	pliensbachian	pb1c-pb2a		13	5	0.384615									0	0
Passaloteuthididae	Coeloteuthis	stantonensis	pliensbachian	pb1a-pb1b		50	17	0.34									0	0
Passaloteuthididae	Coeloteuthis	stantonensis	pliensbachian	pb1a-pb1b	37	11	9.02	0.82	7.9823	1.13			22	27.5		829.385	792.004	9.25215
Passaloteuthididae	Coeloteuthis	stantonensis	pliensbachian	pb1a-pb1b	22	6	5.4	0.9	4.90909	1.1						166.562	159.055	5.41812
Passaloteuthididae	Passaloteuthis	bisulcata	pliensbachian-toarcian	pb-tc1a	78	61	17.69	0.29	15.5175	1.14		0.81	16		1.7	17535.1	16744.8	25.5835
Passaloteuthididae	Passaloteuthis	bisulcata	pliensbachian-toarcian	pb-tc1a	120	78	19.5	0.25	17.8899	1.09		0.92				28494.8	27210.6	30.0778
Passaloteuthididae	Passaloteuthis	bisulcata	pliensbachian-toarcian	pb-tc1a	122	87	21.75	0.25	19.9541	1.09		0.89				39540.3	37758.2	33.5483
Passaloteuthididae	Passaloteuthis	bisulcata	pliensbachian-toarcian	pb-tc1a	152	89	24.92	0.28	23.9615	1.04		0.9	18.5	25	1.5	55652.1	53143.8	37.5968
Passaloteuthididae	Passaloteuthis	laevigata	pliensbachian-toarcian	pb-tc1a	110	63	16.38	0.26	15.3084	1.07		0.87			0.4	16543	15797.4	25.0916
Passaloteuthididae	Passaloteuthis	laevigata	pliensbachian-toarcian	pb-tc1a	100	56	16.24	0.29	15.037	1.08		0.78			0.5	14320.7	13675.3	23.9136
Passaloteuthididae	Passaloteuthis	laevigata	pliensbachian-toarcian	pb-tc1a	120	78	17.94	0.23	17.94	1						26288.6	25103.8	29.2806
Passaloteuthididae	Passaloteuthis	apicicurvata	pliensbachian	pb1		141	16	0.113475									0	0
Passaloteuthididae	Passaloteuthis	apicicurvata	pliensbachian	pb1	164	115	14.95	0.13	13.7156	1.09		0.89	19	29.5		24693.5	23580.5	28.676
Passaloteuthididae	Passaloteuthis	apicicurvata	pliensbachian	pb1	124	82	13.12	0.16	11.7143	1.12		0.96				13197.5	12602.7	23.2713
Passaloteuthididae	Passaloteuthis	carinata	pliensbachian	pb1	91	60	10.2	0.17	9.3578	1.09						5997.27	5726.97	17.8913
Passaloteuthididae	Passaloteuthis	carinata	pliensbachian	pb1	118	83	10.79	0.13	9.46491	1.14						8876.56	8476.49	20.3894
Passaloteuthididae	Passaloteuthis	milleri	pliensbachian-toarcian	pb2-tc1a	90	60	10.8	0.18	10	1.08		0.9			1	6785.84	6480	18.6434
Passaloteuthididae	Passaloteuthis	milleri	pliensbachian-toarcian	pb2-tc1a	61	52	9.88	0.19				1.1	8	29			0	0
Passaloteuthididae	Passaloteuthis	milleri	pliensbachian-toarcian	pb2-tc1a	77	52	9.1	0.175	9.68085	0.94					0.3	4797.19	4580.98	16.6081
Passaloteuthididae	Passaloteuthis	milleri	pliensbachian-toarcian	pb2-tc1a	69	53	9.01	0.17	8.83333	1.02		0.97	4	25		4417.27	4218.18	16.1575
Passaloteuthididae	Passaloteuthis	faseolus	pliensbachian	pb1	102	76	15.2	0.2	12.8814	1.18		1.07	24	30	0.7	15582.9	14880.5	24.5965
Passaloteuthididae	Passaloteuthis	faseolus	pliensbachian	pb1	118	88	13.2	0.15	11	1.2		1.23				13380.7	12777.6	23.3785
Passaloteuthididae	Passaloteuthis	faseolus	pliensbachian	pb1	139	96	19.2	0.2	17.4545	1.1		1.1		29	0.6	33690.7	32172.2	31.8049
Passaloteuthididae	Passaloteuthis	faseolus	pliensbachian	pb1	96	61	13.42	0.22	12.5421	1.07		1.04	31			10751.8	10267.2	21.7345
Passaloteuthididae	Gastrobelus	ventroplanus	pliensbachian	pb1c;pb2a	54	32	8.96	0.28	10.2989	0.87		1.17	25	23	1.8	3092.26	2952.89	14.3466
Passaloteuthididae	Gastrobelus	ventroplanus	pliensbachian	pb1c;pb2a	81	48	14.4	0.3	16	0.9		1	19	22	1.8	11581.2	11059.2	22.2796
Passaloteuthididae	Gastrobelus	umbilicatus	pliensbachian	pb1c;pb2a		72	8.8	0.122222	8.46154	1.04		1.2					5361.23	17.502
Passaloteuthididae	Gastrobelus	umbilicatus	pliensbachian	pb1c;pb2a	66	49	8.33	0.17	9.46591	0.88		1.05				4046.06	3863.7	15.6916
Passaloteuthididae	Gastrobelus	teres	pliensbachian	pb2a;pb2b	98	56	17.36	0.31	17.36	1				27	4	17673.2	16876.7	25.6505
Passaloteuthididae	Gastrobelus	teres	pliensbachian	pb2a;pb2b	106	64	19.84	0.31	19.0769	1.04					3	25366.4	24223.1	28.9341
Passaloteuthididae	Gastrobelus	teres	pliensbachian	pb2a;pb2b	79	47	15.04	0.32	17.9048	0.84		1	17	23	3.5	13253.9	12656.5	23.3044
Passaloteuthididae	Pleurobelus	compressus	pliensbachian	pb2a	40												0	0
Passaloteuthididae	Pleurobelus	compressus	pliensbachian	pb2a	67.5	42	10.08	0.24	7.81395	1.29		1.18		25	0.4	3464.25	3308.12	14.9002
Passaloteuthididae	Pleurobelus	lagenaeformis	pliensbachian	pb2a		96	11	0.114583	10	1.1						11058.4	10560	21.9392
Passaloteuthididae	Pleurobelus	lagenaeformis	pliensbachian	pb2a	80	67	8.71	0.13	8.29524	1.05				25		5069.33	4840.85	16.9164
Passaloteuthididae	Pleurobelus	lagenaeformis	pliensbachian	pb2a	41	22	7.92	0.36	7.92	1					1.5	1445.11	1379.98	11.1333
Passaloteuthididae	Pleurobelus	subirregularis	pliensbachian	pb2a	41	19	7.6	0.4	6.33333	1.2					2	957.697	914.533	9.70659
Passaloteuthididae	Pleurobelus	subirregularis	pliensbachian	pb2a	43	18	9.18	0.51	8.05263	1.14					3.5	1393.42	1330.62	10.9989
Passaloteuthididae	Parapassaloteuthis	zieteni	pliensbachian-toarcian	pb2-tc1a		54	16	0.296296	14.5455	1.1						13160.4	12567.3	23.2495
Passaloteuthididae	Parapassaloteuthis	zieteni	pliensbachian-toarcian	pb2-tc1a	58	27	14.04	0.52	14.04	1		0.85				5573.48	5322.28	17.4595
Passaloteuthididae	Parapassaloteuthis	zieteni	pliensbachian-toarcian	pb2-tc1a	51	23	11.04	0.48	11.6211	0.95		0.79				3090.09	2950.82	14.3432
Passaloteuthididae	Parapassaloteuthis	zieteni	pliensbachian-toarcian	pb2-tc1a	53	26	13	0.5				0.82	28	26			0	0
Passaloteuthididae	Parapassaloteuthis	brevis	pliensbachian-toarcian	pb1c	53	30	12	0.4				0.8			1		0	0
Passaloteuthididae	Parapassaloteuthis	brevis	pliensbachian-toarcian	pb1c	56	32	10.88	0.34	10.5631	1.03			26	27	0.3	3851.23	3677.65	15.4356
Passaloteuthididae	Parapassaloteuthis	brevis	pliensbachian-toarcian	pb1c	48	26	10.14	0.39					21	27			0	0
Passaloteuthididae	Micropassaloteuthis	fistulata	toarcian	tc1a	31					1.07							0	0
Passaloteuthididae	Micropassaloteuthis	fistulata	toarcian	tc1a	35	28	2.8	0.1	2.61682	1.07				26		214.842	205.159	5.89789
Hastitidae	Bairstowius	junceus	pliensbachian	pb1b	124	106	6.36	0.06	5.3	1.2		0.76	4			3741.69	3573.05	15.2878
Hastitidae	Bairstowius	junceus	pliensbachian	pb1b	136	116	4.64	0.04				1.2					0	0
Hastitidae	Bairstowius	junceus	pliensbachian	pb1b	115	98	5.88	0.06	6	0.98		1.1	9	30		3620.62	3457.44	15.1212
Hastitidae	Bairstowius	junceus	pliensbachian	pb1b	119	104	5.2	0.05	4.72727	1.1		1.07	16	23		2677.17	2556.51	13.6736
Hastitidae	Bairstowius	junceus	pliensbachian	pb1b	115	105	5.25	0.05	4.56522	1.15		1.16				2635.35	2516.58	13.602
Hastitidae	Bairstowius	charmouthensis	pliensbachian	pb1	78	64	5.76	0.09	5.48571	1.05		1.16				2117.7	2022.25	12.6458
Hastitidae	Bairstowius	charmouthensis	pliensbachian	pb1	72	62	3.72	0.06	3.72	1		1.4			0.5	898.475	857.981	9.50224
Hastitidae	Bairstowius	charmouthensis	pliensbachian	pb1	111	93	6.51	0.07	5.8125	1.12		1.41				3685.15	3519.06	15.2105
Hastitidae	Bairstowius	charmouthensis	pliensbachian	pb1	70	51	7.14	0.14	6.26316	1.14		1.2	13	24.5		2388.31	2280.67	13.163
Hastitidae	Hastites	clavatus	pliensbachian	pb1b-pb2a		31	5.9	0.190323	5.67308	1.04		2.4				1086.58	1037.61	10.1238
Hastitidae	Hastites	clavatus	pliensbachian	pb1b-pb2a	48	44	4.3	0.0977273	4.3	1		1.9	1	28	0.3	851.958	813.56	9.33533
Hastitidae	Hastites	clavatus	pliensbachian	pb1b-pb2a		44	4.8	0.109091	4.70588	1.02		2.3				1040.79	993.882	9.97957
Hastitidae	Hastites	microstylus	pliensbachian	pb1b	75	42	2.1	0.05				1.5		18	0.4		0	0
Hastitidae	Hastites	microstylus	pliensbachian	pb1b		54	1.89	0.035	1.89	1		1.7	10			201.997	192.893	5.77793
Hastitidae	Hastites	araris	pliensbachian	pb1a-pb1b	39	28	4.48	0.16	4.07273	1.1		1.1			0.1	534.995	510.883	7.99418
Hastitidae	Hastites	araris	pliensbachian	pb1a-pb1b	30	21	5.04	0.24	4.30769	1.17			4	23	0.1	477.445	455.926	7.69659
Hastitidae	Hastites	araris	pliensbachian	pb1a-pb1b	35	23	4.6	0.2	4.38095	1.05		1.1				485.381	463.505	7.739
Hastitidae	Hastites	compressoides	pliensbachian	pb1a?-pb1b	35	27	4.59	0.17	3.27857	1.4		1.8				425.49	406.313	7.40663
Hastitidae	Hastites	compressoides	pliensbachian	pb1a?-pb1b	41	30	5.4	0.18	4.32	1.25		1.4	18	25		732.871	699.84	8.87836
Hastitidae	Hastites	compressoides	pliensbachian	pb1a?-pb1b		29	5.22	0.18	4.176	1.25						661.999	632.163	8.58242
Hastitidae	Hastites	spadixari	pliensbachian	pb1	114	95	7.6	0.08				2.2			1		0	0
Hastitidae	Hastites	spadixari	pliensbachian	pb1	111	93	11.16	0.12	10.9412	1.02		1.77			1	11891.6	11355.6	22.4769
Hastitidae	Hastites	spadixari	pliensbachian	pb1		61	8.2	0.134426	8.45361	0.97		1.6					4228.49	16.1707
Hastitidae	Pseudohastites	longiformis	pliensbachian	pb2b	73	61	4.88	0.08				1.35					0	0
Hastitidae	Pseudohastites	longiformis	pliensbachian	pb2b	78	58	6.96	0.12	6.82353	1.02		1.11				2884.53	2754.52	14.0179
Hastitidae	Pseudohastites	longiformis	pliensbachian	pb2b	63	46	7.36	0.16					7	22	0.1		0	0
Acroelitidae	Acroelites	oxycone	toarcian	tc1c-tc2	102	65	11.05	0.17		1.18		0.7					0	0
Acroelitidae	Acroelites	oxycone	toarcian	tc1c-tc2	107	56	13.44	0.24	11.2	1.2		0.7				8827.42	8429.57	20.3518
Acroelitidae	Acroelites	oxycone	toarcian	tc1c-tc2	115									24			0	0
Acroelitidae	Acroelites	riegrafi	toarcian	tc1b-tc1c	108	80	11.2	0.14	10.4673	1.07		0.7			0.5	9821.34	9378.69	21.0886
Acroelitidae	Acroelites	riegrafi	toarcian	tc1b-tc1c	98	73	11.68	0.16	9.57377	1.22						8548.25	8162.98	20.1349
Acroelitidae	Acroelites	ilminstrensis	toarcian	tc1b-tc1c	168	66	11.88	0.18	10.8991	1.09		0.75				8949.09	8545.75	20.4448
Acroelitidae	Acroelites	ilminstrensis	toarcian	tc1b-tc1c	94	64	10.24	0.16	10.0392	1.02		0.85			0.2	6889.83	6579.3	18.7381
Acroelitidae	Acroelites	ilminstrensis	toarcian	tc1b-tc1c	85	62	14.26	0.23	13.0826	1.09		0.81		22		12112.5	11566.6	22.6153
Acroelitidae	Acroelites	ilminstrensis	toarcian	tc1b-tc1c	62	62	11.78	0.19	11.0093	1.07						8420.29	8040.79	20.0339
Acroelitidae	Acroelites	ilminstrensis	toarcian	tc1b-tc1c	75	52	9.88	0.19	9.5	1.04						5111.08	4880.72	16.9627
Acroelitidae	Acroelites	ilminstrensis	toarcian	tc1b-tc1c	94	68	9.52	0.14	10.2366	0.93						6939.5	6626.74	18.7831
Acroelitidae	Acroelites	gracilis	toarcian	tc1	164	110	12.1	0.11	10.5217	1.15		0.62				14665.4	14004.4	24.104
Acroelitidae	Acroelites	gracilis	toarcian	tc1	176	135	10.8	0.08	9.47368	1.14		0.8			0.2	14464.6	13812.6	23.9934
Acroelitidae	Acroelites	gracilis	toarcian	tc1	175	102	12.24	0.12				0.73					0	0
Acroelitidae	Acroelites	subgracilis	toarcian	tc2c	101	73	10.95	0.15	8.48837	1.29		0.79			0.5	7105.42	6785.18	18.9316
Acroelitidae	Acroelites	subgracilis	toarcian	tc2c	88	61	10.98	0.18	8.51163	1.29		0.8	39	26		5969.99	5700.92	17.8641
Acroelitidae	Acroelites	graciliformis	toarcian	tc2c	74	47	13.16	0.28	11.0588	1.19						7162.94	6840.1	18.9825
Acroelitidae	Acroelites	graciliformis	toarcian	tc2c	72	48	11.808	0.246	9.92269	1.19						5889.46	5624.02	17.7834
Acroelitidae	Acroelites	graciliformis	toarcian	tc2c	78	55	11	0.2	9.56522	1.15						6060.09	5786.96	17.9535
Acroelitidae	Acroelites	quendstedti	toarcian-aalenian	tc2c-al1	94	66	14.52	0.22	13.5701	1.07						13618.3	13004.5	23.5161
Acroelitidae	Acroelites	quendstedti	toarcian-aalenian	tc2c-al1	101	72	15.84	0.22									0	0
Acroelitidae	Acroelites	quendstedti	toarcian-aalenian	tc2c-al1	93	60	15	0.25	13.7615	1.09						12969.9	12385.3	23.1368
Acroelitidae	Acroelites	quendstedti	toarcian-aalenian	tc2c-al1	93	57	15.39	0.27	14.25	1.08						13090.5	12500.5	23.2083
Acroelitidae	Acroelites	conoideus	toarcian-aalenian	tc2c-al1	92	57	18.24	0.32	17.0467	1.07						18559.6	17723.1	26.0724
Acroelitidae	Acroelites	conoideus	toarcian-aalenian	tc2c-al1	105	57	18.81	0.33	16.9459	1.11						19026.5	18168.9	26.2891
Acroelitidae	Acroelites	conoideus	toarcian-aalenian	tc2c-al1	94	58	17.98	0.31	17.1238	1.05						18700.2	17857.4	26.138
Acroelitidae	Acroelites	conoideus	toarcian-aalenian	tc2c-al1	98	62	20.46	0.33	18.1062	1.13						24052.1	22968.1	28.4255
Acroelitidae	Acroelites	trilsulculosus	toarcian	tc1b	163	133	17.29	0.13	14.7778	1.17						35586.4	33982.5	32.3906
Acroelitidae	Acroelites	trilsulculosus	toarcian	tc1b	176	100	16	0.16	14.1593	1.13						23724.1	22654.9	28.2957
Acroelitidae	Acroelites	trilsulculosus	toarcian	tc1b	178	138	20.7	0.15	17.8448	1.16						53381.5	50975.5	37.0784
Acroelitidae	Acroelites	trilsulculosus	toarcian	tc1b	216	175	26.25	0.15	21.5164	1.22						103506	98840.9	46.2359
Acroelitidae	Acroelites	banzensis	toarcian	tc2c	99	64	17.92	0.28	15.4483	1.16		0.75			0.5	18553.5	17717.3	26.0695
Acroelitidae	Acroelites	banzensis	toarcian	tc2c	94	58	16.24	0.28	13.2033	1.23		0.75				13023.4	12436.4	23.1685
Acroelitidae	Acroelites	glaber	toarcian	tc2b-tc2c	148	98	24.5	0.25	20.7627	1.18		0.76		28		52204.1	49851.3	36.8038
Acroelitidae	Acroelites	glaber	toarcian	tc2b-tc2c	150	99	24.75	0.25	20.9746	1.18		0.72				53818.6	51393	37.1793
Acroelitidae	Odontobelus	pyramidalis	toarcian	tc1c-tc2	55	31	11.47	0.37	10.9238	1.05		0.72				4067.5	3884.18	15.7193
Acroelitidae	Odontobelus	pyramidalis	toarcian	tc1c-tc2	48	27	9.72	0.36	8.45217	1.15		0.77				2322.88	2218.19	13.0417
Acroelitidae	Odontobelus	pyramidalis	toarcian	tc1c-tc2	54	26	11.18	0.43	11.0693	1.01		0.73	25	23		3369.49	3217.63	14.7631
Acroelitidae	Odontobelus	pyramidalis	toarcian	tc1c-tc2	53	31	11.78	0.38	10.2435	1.15		0.71				3917.27	3740.71	15.5233
Acroelitidae	Odontobelus	pyramidalis	toarcian	tc1c-tc2	50	33	10.89	0.33				0.81	23	26			0	0
Acroelitidae	Odontobelus	curtus	toarcian-aalenian	tc2c-al1		27	9.5	0.351852	8.48214	1.12						2278.36	2175.67	12.9578
Acroelitidae	Odontobelus	curtus	toarcian-aalenian	tc2c-al1	41	20	10.8	0.54	8.64	1.25		0.71	25	26	0.4	1954.32	1866.24	12.3118
Acroelitidae	Odontobelus	curtus	toarcian-aalenian	tc2c-al1	52	25	13	0.52	10	1.3						3403.39	3250	14.8125
Acroelitidae	Odontobelus	curtus	toarcian-aalenian	tc2c-al1	50	18	11.7	0.65	9.36	1.25		0.74	29	29	0.3	2064.25	1971.22	12.5385
Acroelitidae	Odontobelus	curtus	toarcian-aalenian	tc2c-al1	33	9	5.49	0.61	4.12782	1.33			34	33		213.582	203.956	5.88634
Acroelitidae	Odontobelus	brevisulcatus	toarcian	tc2a-tc2b	106	77	12.32	0.16	11.0991	1.11			7	25		11026	10529	21.9178
Acroelitidae	Odontobelus	brevisulcatus	toarcian	tc2a-tc2b	139	102	16.32	0.16	13.7143	1.19						23906.8	22829.3	28.3682
Acroelitidae	Odontobelus	subbrevis	toarcian	tc2c	46	13	7.8	0.6	7.09091	1.1					0.5	752.954	719.018	8.95873
Acroelitidae	Youngibelus	tubularis	toarcian	tc1b		220	12	0.0545455									0	0
Acroelitidae	Youngibelus	tubularis	toarcian	tc1b		205	11	0.0536585	9.2437	1.19						21828.3	20844.5	27.521
Acroelitidae	Youngibelus	tubularis	toarcian	tc1b	185	146	7.3	0.05				0.7	11				0	0
Acroelitidae	Youngibelus	tubularis	toarcian	tc1b		202	10	0.049505	8.33333	1.2						17627.8	16833.3	25.6285
Acroelitidae	Youngibelus	tubularis	toarcian	tc1b	163	131	8.515	0.065				0.8					0	0
Acroelitidae	Youngibelus	ohmdenensis	toarcian	tc1b-tc2a	264	210	16.8	0.08	14.4828	1.16						53506.7	51095.2	37.1074
Acroelitidae	Youngibelus	ohmdenensis	toarcian	tc1b-tc2a	205	143	12.441	0.087	10.6333	1.17						19810.2	18917.4	26.6453
Acroelitidae	Youngibelus	simpsoni	toarcian	tc1b	106	64	12.16	0.19	10.8571	1.12		0.96				8848.26	8449.46	20.3677
Acroelitidae	Youngibelus	simpsoni	toarcian	tc1b	90	52	12.48	0.24	10.6667	1.17						7248.95	6922.24	19.0582
Acroelitidae	Simpsonibelus	lentus	toarcian	tc1c	81	68	8.84	0.13	7.01587	1.26		1.02				4416.43	4217.38	16.1565
Acroelitidae	Simpsonibelus	lentus	toarcian	tc1c	85	63	9.45	0.15	8.21739	1.15		1.08				5123.12	4892.22	16.976
Acroelitidae	Simpsonibelus	lentus	toarcian	tc1c	65	48	7.68	0.16				1.14	36	21			0	0
Acroelitidae	Simpsonibelus	lentus	toarcian	tc1c	90	68	7.48	0.11	6.73874	1.11		1.04			0.2	3589.37	3427.59	15.0775
Acroelitidae	Dactyloteuthis	irregularis	toarcian	tc2a-tc2b	77	32	20.8	0.65	15.5224	1.34						10819.3	10331.7	21.78
Acroelitidae	Dactyloteuthis	irregularis	toarcian	tc2a-tc2b	72	35	19.25	0.55	14.8077	1.3						10447.6	9976.68	21.5276
Acroelitidae	Dactyloteuthis	irregularis	toarcian	tc2a-tc2b	60	26	17.16	0.66	13.2	1.3						6167.27	5889.31	18.0588
Acroelitidae	Dactyloteuthis	irregularis	toarcian	tc2a-tc2b	60	28	17.36	0.62	13.2519	1.31						6745.51	6441.49	18.6064
Acroelitidae	Dactyloteuthis	similis	toarcian	tc2b-tc2c	78	52	13	0.25	9.62963	1.35						6816.87	6509.63	18.6718
Acroelitidae	Dactyloteuthis	similis	toarcian	tc2b-tc2c	72	39	7.41	0.19									0	0
Acroelitidae	Dactyloteuthis	similis	toarcian	tc2b-tc2c	93	53	15.37	0.29	11.6439	1.32						9932.95	9485.27	21.1682
Acroelitidae	Dactyloteuthis	similis	toarcian	tc2b-tc2c	63	36	11.88	0.33	9.2093	1.29						4124.53	3938.63	15.7924
Acroelitidae	Dactyloteuthis	semistriata	toarcian	tc1c-tc2b	227	177	12.39	0.07									0	0
Acroelitidae	Dactyloteuthis	semistriata	toarcian	tc1c-tc2b	58	24	15.84	0.66	13.2	1.2						5254.95	5018.11	17.1204
Acroelitidae	Dactyloteuthis	semistriata	toarcian	tc1c-tc2b	191	162	12.96	0.08									0	0
Acroelitidae	Dactyloteuthis	semistriata	toarcian	tc1c-tc2b	69	23	15	0.217391									0	0
Acroelitidae	Dactyloteuthis	semistriata	toarcian	tc1c-tc2b	213	170	13.6	0.08	10.0741	1.35						24390.5	23291.3	28.5582
Acroelitidae	Dactyloteuthis	wrighti	toarcian	tc1c-tc2a	105	48	15.84	0.33	12.5714	1.26		0.88	16	22	0.1	10009.4	9558.31	21.2224
Acroelitidae	Dactyloteuthis	wrighti	toarcian	tc1c-tc2a	87	44	14.08	0.32	12.1379	1.16		0.84				7874.6	7519.69	19.5915
Acroelitidae	Dactyloteuthis	wrighti	toarcian	tc1c-tc2a	105	56	14.56	0.26	12.0331	1.21		0.82				10274.3	9811.27	21.408
Acroelitidae	Dactyloteuthis	incurvata	toarcian	tc1c	57	21	13.65	0.65	11.8696	1.15		0.83	5	25	0.3	3563	3402.41	15.0405
Acroelitidae	Dactyloteuthis	incurvata	toarcian	tc1c	66	34	15.64	0.46	12.0308	1.3		0.8				6699.43	6397.48	18.5639
Acroelitidae	Dactyloteuthis	incurvata	toarcian	tc1c	72	32	15.36	0.48	12.0945	1.27		0.86				6225.26	5944.68	18.1152
Acroelitidae	Dactyloteuthis	levidensis	toarcian	tc2	67	33	18.81	0.57	16.3565	1.15		0.83			1	10632.2	10153	21.6537
Acroelitidae	Dactyloteuthis	levidensis	toarcian	tc2	76	35	21.35	0.61	18.2479	1.17		0.81			1.7	14279.3	13635.7	23.8905
Acroelitidae	Dactyloteuthis	levidensis	toarcian	tc2	98	41	24.6	0.6	21.0256	1.17		0.8			1	22207.4	21206.5	27.6794
Acroelitidae	Dactyloteuthis	levidensis	toarcian	tc2	85	40	20.8	0.52	18.9091	1.1		0.75	10	27		16474.9	15732.4	25.0571
Acroelitidae	Catateuthis	inaudita	toarcian	tc1c	107	79	13.43	0.17	9.59286	1.4		1.09			1	10658.1	10177.7	21.6712
Acroelitidae	Catateuthis	inaudita	toarcian	tc1c	107	72	12.24	0.17	9	1.36		1.04			1	8305.87	7931.52	19.9428
Acroelitidae	Catateuthis	inaudita	toarcian	tc1c	87	65	8.515	0.131				1.04	21	24			0	0
Acroelitidae	Catateuthis	inaudita	toarcian	tc1c	101	69	9.66	0.14	7.54688	1.28		1.03				5267.71	5030.29	17.1342
Acroelitidae	Acrobelus	meta	toarcian	tc2	80	38	22.8	0.6	19.6552	1.16		0.85			4	17833	17029.2	25.7276
Acroelitidae	Acrobelus	meta	toarcian	tc2	73	32	22.4	0.7	19.3103	1.16		0.8			3.5	14494.9	13841.7	24.0102
Acroelitidae	Acrobelus	meta	toarcian	tc2	85	41	26.65	0.65	22.7778	1.17		0.79			2	26062.8	24888.1	29.1965
Acroelitidae	Brevibelus	breviformis	toarcian	tc2b-al1	53	30	13.5	0.45	13.9175	0.97		0.85			0.4	5902.63	5636.6	17.7967
Acroelitidae	Brevibelus	breviformis	toarcian	tc2b-al1	55	33	10.89	0.33				0.78					0	0
Acroelitidae	Brevibelus	breviformis	toarcian	tc2b-al1	66	25	13	0.52	12.6214	1.03		0.84	41	25	0.3	4295.54	4101.94	16.0077
Acroelitidae	Brevibelus	breviformis	toarcian	tc2b-al1	56	27	11.34	0.42	11.1176	1.02		0.82				3564.66	3404	15.0428
Acroelitidae	Brevibelus	gingensis	bajocian	bj1-bj2	44	14	8.96	0.64	8.78431	1.02						1153.91	1101.9	10.3288
Acroelitidae	Brevibelus	gingensis	bajocian	bj1-bj2	49	17	11.56	0.68									0	0
Acroelitidae	Brevibelus	gingensis	bajocian	bj1-bj2	47	16	9.44	0.59	9.44	1						1493.11	1425.82	11.2552
Acroelitidae	Brevibelus	gingensis	bajocian	bj1-bj2	31	14	8.82	0.63	8.4	1.05			45	23		1086.19	1037.23	10.1226
Acroelitidae	Homaloteuthis	spinata	aalenian	al2	137	85	22.1	0.26	19.2174	1.15		0.78				37803.7	36099.9	33.0498
Acroelitidae	Homaloteuthis	spinata	aalenian	al2	150			0.29		1.43			36	26			0	0
Acroelitidae	Homaloteuthis	spinata	aalenian	al2	90	52	15.6	0.3				0.71			0.5		0	0
Salpingoteuthidae	Salpingoteuthis	trisulcata	toarcian	tc2c	85	70	7.7	0.11	8.27957	0.93						4673.32	4462.69	16.4639
Salpingoteuthidae	Salpingoteuthis	trisulcata	toarcian	tc2c	71	55	7.7	0.14	7.7	1						3414.86	3260.95	14.8291
Salpingoteuthidae	Salpingoteuthis	trisulcata	toarcian	tc2c	79	66	6.6	0.1	6.40777	1.03		0.81				2922.96	2791.22	14.0799
Salpingoteuthidae	Salpingoteuthis	trisulcata	toarcian	tc2c	58	44	5.984	0.136				0.63	16	31		0	0	0
Salpingoteuthidae	Salpingoteuthis	baubini	toarcian	tc1c-tc2a	128	97	14.55	0.15	12.125	1.2		0.69			0.5	17920.3	17112.6	25.7695
Salpingoteuthidae	Salpingoteuthis	baubini	toarcian	tc1c-tc2a	130	96	15.36	0.16	11.8154	1.3		0.73			0.5	18244.8	17422.5	25.9241
Salpingoteuthidae	Salpingoteuthis	baubini	toarcian	tc1c-tc2a	130	88	14.96	0.17	13.2389	1.13		0.61			1	18251.4	17428.8	25.9272
Salpingoteuthidae	Salpingoteuthis	baubini	toarcian	tc1c-tc2a	120	95	11.4	0.12	9.74359	1.17		0.85				11050.4	10552.3	21.9339
Salpingoteuthidae	Salpingoteuthis	longisulcata	toarcian	tc2b-tc2c	151	100	17	0.17	13.2812	1.28		0.66			1.7	23643.8	22578.1	28.2637
Salpingoteuthidae	Salpingoteuthis	longisulcata	toarcian	tc2b-tc2c	133	100	11	0.11	8.66142	1.27		0.78			1.2	9977.24	9527.56	21.1996
Salpingoteuthidae	Salpingoteuthis	longisulcata	toarcian	tc2b-tc2c	170	112	19.04	0.17	16.1356	1.18						36032.8	34408.8	32.5254
Salpingoteuthidae	Salpingoteuthis	longisulcata	toarcian	tc2b-tc2c	112	80	13.6	0.17				0.72	3	27			0	0
Salpingoteuthidae	Salpingoteuthis	macra	toarcian	tc2c	126	109	8.175	0.075	7.1087	1.15		0.73			0.7	6633.35	6334.38	18.5027
Salpingoteuthidae	Salpingoteuthis	macra	toarcian	tc2c	115	93	7.998	0.086	6.77797	1.18		0.63				5279.49	5041.55	17.147
Salpingoteuthidae	Salpingoteuthis	tessioniana	toarcian	tc2c		27	4.7	0.174074	4.27273	1.1						567.8	542.209	8.15434
Salpingoteuthidae	Salpingoteuthis	tessioniana	toarcian	tc2c	23	15	3.3	0.22	3.14286	1.05						162.914	155.571	5.37828
Salpingoteuthidae	Salpingoteuthis	dorsetensis	toarcian	tc2c-al1a	44	29	6.38	0.22	6.13462	1.04		0.75			0.8	1188.6	1135.03	10.4312
Salpingoteuthidae	Salpingoteuthis	dorsetensis	toarcian	tc2c-al1a	41	31	6.2	0.2	5.79439	1.07		0.75				1166.25	1113.68	10.3654
Rhabdobelidae	Rhabdobelus	exilis	toarcian	tc2b-tc2c	106		5		4.54545	1.1		1.2					0	0
Rhabdobelidae	Rhabdobelus	exilis	toarcian	tc2b-tc2c	50	42	3.78	0.09	3.024	1.25		1			0.1	502.749	480.09	7.83023
Rhabdobelidae	Rhabdobelus	exilis	toarcian	tc2b-tc2c	56	46	3.22	0.07	2.51562	1.28		1.2				390.201	372.614	7.19592
Rhabdobelidae	Rhabdobelus	exilis	toarcian	tc2b-tc2c	50	40	3.6	0.09	3.78947	0.95		1.1		22		571.439	545.684	8.17173
Rhabdobelidae	Rhabdobelus	exilis	toarcian	tc2b-tc2c	78	65	3.9	0.06	3.25	1.2		1.2				862.76	823.875	9.37462
Rhabdobelidae	Rhabdobelus	parvus	toarcian	tc2b-tc2c	22	19	2.85	0.15				1.1					0	0
Rhabdobelidae	Rhabdobelus	parvus	toarcian	tc2b-tc2c	28	20	3.8	0.19	3.65385	1.04		0.97	14	26		290.799	277.692	6.52411
Rhabdobelidae	Rhabdobelus	parvus	toarcian	tc2b-tc2c	31	22	3.96	0.18				1	5	32			0	0
Rhabdobelidae	Rhabdobelus	parvus	toarcian	tc2b-tc2c	34	25	3.75	0.15	3.90625	0.96		1				383.495	366.211	7.15446
Rhabdobelidae	Rhabdobelus	serpulatus	toarcian	tc2c	37		2		0.51			1					0	0
Rhabdobelidae	Neoclavibelus	neumarktensis	toarcian	tc2c-al1a	44	40	5.5	0.1375	5.5	1		1.51			0.2	1267.11	1210	10.656
Rhabdobelidae	Neoclavibelus	neumarktensis	toarcian	tc2c-al1a	32		4.7			1.07		3.3					0	0
Rhabdobelidae	Neoclavibelus	neumarktensis	toarcian	tc2c-al1a	26		4.3			1		2.5					0	0
Rhabdobelidae	Neoclavibelus	subclavatus	toarcian	tc2c-al1a	41	35	4.2	0.12	4.2	1		1.3				646.54	617.4	8.51508
Rhabdobelidae	Neoclavibelus	subclavatus	toarcian	tc2c-al1a	47	41	3.28	0.08	3.41667	0.96		1.45	40.4	32		481.159	459.473	7.7165
Rhabdobelidae	Neoclavibelus	subclavatus	toarcian	tc2c-al1a	51	43	5.16	0.12	4.86792	1.06		1.3				1131.07	1080.1	10.2602
Rhabdobelidae	Neoclavibelus	forthensis	toarcian	tc2c	59	52	3.588	0.069	3.45	1.04		1.53				674.068	643.687	8.63426
Rhabdobelidae	Neoclavibelus	forthensis	toarcian	tc2c	58	53	2.756	0.052	2.65	1.04		1.78				405.349	387.08	7.28786
Rhabdobelidae	Neoclavibelus	compactus	toarcian	tc2c	46	35	6.3	0.18	6.05769	1.04		1.16				1398.76	1335.72	11.013
Rhabdobelidae	Neoclavibelus	compactus	toarcian	tc2c	45	34	5.78	0.17	5.25455	1.1		1.21	22	28		1081.36	1032.62	10.1076
Rhabdobelidae	Mesoteuthis	rhenana	toarcian	tc2c-al1	160	95	21.85	0.23				0.83					0	0
Rhabdobelidae	Mesoteuthis	rhenana	toarcian	tc2c-al1	114	68	23.12	0.34	21.4074	1.08		0.76	32	27		35244.3	33655.9	32.2864
Rhabdobelidae	Mesoteuthis	rhenana	toarcian	tc2c-al1	132	69	21.39	0.31	19.9907	1.07		0.7				30896.9	29504.4	30.9003
Rhabdobelidae	Mesoteuthis	rhenana	toarcian	tc2c-al1	152	76	28.12	0.37	24.885	1.13		0.82			1	55692.2	53182.1	37.6058
Rhabdobelidae	Mesoteuthis	rhenana	toarcian	tc2c-al1	145	84	24.36	0.29				0.89	20	25			0	0
Rhabdobelidae	Mesoteuthis	beneckei	aalenian	al2	180	85	20.4	0.24	17	1.2		0.73				30869.3	29478	30.8911
Rhabdobelidae	Mesoteuthis	beneckei	aalenian	al2	163	73	21.17	0.29				0.78	30	26			0	0
Rhabdobelidae	Mesoteuthis	ernsti	toarcian	tc2c	77	42	15.54	0.37	14.8	1.05		0.67				10115.6	9659.66	21.2971
Rhabdobelidae	Mesoteuthis	ernsti	toarcian	tc2c	60	36	15.84	0.44				0.63	33	27	1		0	0
Rhabdobelidae	Mesoteuthis	ernsti	toarcian	tc2c	79	43	17.2	0.4	15.0877	1.14		0.69	22	26	1.3	11685.5	11158.9	22.3464

## Sheet: Table S2 - field data
															fragmented specimens			apertural height	apertural width				Post phragmocone volumes
																								Vec	Vecy	Vmed
Specimen	Location	Formation	Family	Genus	Species	Age	Zone	Level	SNSB reference numbers	Ontogeny	L	l	Dv	Dl	L'	H'	W'	H	W	Geometric mean	Maximum diameter*	TV	PPV	elliptical cone	elliptical cylinder	cone+cylinder /2
1	Teufelsgraben	Posidonia shale	Acrocoelitidae	Dactyloteuthis	hebetata	Toarcian	variabilis	CK-15	SNSB-BSPG 2018 IX 1	adult	47.5	16.8	9.7	10.6				9.7	16.5	7.55862	16.5	3620.62	938.51	452.226	1356.68	904.452
2	Teufelsgraben	Posidonia shale	Acrocoelitidae	Dactyloteuthis	hebetata	Toarcian	variabilis	CK-15	SNSB-BSPG 2018 IX 2	adult	41.4	20.17	9.62	8.11				9.8	12.3	7.32736	12.3	2090.8	817.72	411.975	1235.92	823.949
61	Teufelsgraben	Posidonia shale	Acrocoelitidae	Dactyloteuthis	hebetata	Toarcian	variabilis	CK-15	SNSB-BSPG 2018 IX 3	adult	48.2	22.8	12.51	10.29				13.4	15	9.0195	15	4435.17	1443.83	768.38	2305.14	1536.76
4	Teufelsgraben	Posidonia shale	Acrocoelitidae	Dactyloteuthis	hebetata	Toarcian	variabilis	CK-15	SNSB-BSPG 2018 IX 4	juvenile	32.45	21.64	9.08	6.53	33.7	6.6	9			6.8454	9.08	1115.88	679.88	335.912	1007.73	671.823
5	Teufelsgraben	Posidonia shale	Acrocoelitidae	Dactyloteuthis	hebetata	Toarcian	variabilis	CK-15	SNSB-BSPG 2018 IX 5	adult	38.9	17.03	9.91	8.75				11.2	13	7.17374	13	2471.9	695.54	386.603	1159.81	773.206
6	Teufelsgraben	Posidonia shale	Acrocoelitidae	Dactyloteuthis	hebetata	Toarcian	variabilis	CK-15	SNSB-BSPG 2018 IX 6	adult	48.4	19.74	11.47	9.89				12.4	19	8.24168	19	4200.6	1121.12	586.24	1758.72	1172.48
7	Teufelsgraben	Posidonia shale	Acrocoelitidae	Dactyloteuthis	hebetata	Toarcian	variabilis	CK-15	SNSB-BSPG 2018 IX 7	juvenile	34.1	17.48	7.92	7.47				7.3	10.3	6.37053	10.3	1371.59	467	270.742	812.226	541.484
8	Teufelsgraben	Posidonia shale	Acrocoelitidae	Dactyloteuthis	hebetata	Toarcian	variabilis	CK-15	SNSB-BSPG 2018 IX 8	adult	33.91	19.54	11.65	10.02	33.4	9.5	12	9.5	12	8.29251	12	1861.24	878.38	597.155	1791.46	1194.31
9	Teufelsgraben	Posidonia shale	Acrocoelitidae	Dactyloteuthis	hebetata	Toarcian	variabilis	CK-15	SNSB-BSPG 2018 IX 9	juvenile	26.87	15.37	9.4	8.38	25.6	9.6	10.7			6.71422	10.7	1287.14	515.89	316.967	950.902	633.934
10	Teufelsgraben	Posidonia shale	Acrocoelitidae	Dactyloteuthis	hebetata	Toarcian	variabilis	CK-15	SNSB-BSPG 2018 IX 10	adult	29.87	12.49	9.32	8.45	31.2	11.4	13.8			6.26506	13.8	2150.81		257.516	772.547	515.031
11	Teufelsgraben	Posidonia shale	Acrocoelitidae	Dactyloteuthis	hebetata	Toarcian	variabilis	CK-15	SNSB-BSPG 2018 IX 11	adult	50.1	23.54	11.49	10.04				12.4	14.3	8.78888	14.3	4026.49	1225.13	710.933	2132.8	1421.87
12	Teufelsgraben	Posidonia shale	Acrocoelitidae	Dactyloteuthis	hebetata	Toarcian	variabilis	CK-15	SNSB-BSPG 2018 IX 12	adult	54.8	24.45	12.73	10.55				13.1	16.6	9.36339	16.6	4815.34	1480.71	859.663	2578.99	1719.33
13	Teufelsgraben	Posidonia shale	Acrocoelitidae	Dactyloteuthis	hebetata	Toarcian	variabilis	CK-15	SNSB-BSPG 2018 IX 13	adult	39.1	19.21	9.42	7.97				11	12.5	7.11747	12.5	2294.53	866.74	377.577	1132.73	755.153
14	Teufelsgraben	Posidonia shale	Acrocoelitidae	Dactyloteuthis	hebetata	Toarcian	variabilis	CK-15	SNSB-BSPG 2018 IX 14	adult	37.5	17.6	11.94	9.52				11.9	14.2	7.93776	14.2	3035.12	861.61	523.748	1571.24	1047.5
15	Teufelsgraben	Posidonia shale	Acrocoelitidae	Dactyloteuthis	hebetata	Toarcian	variabilis	CK-15	SNSB-BSPG 2018 IX 15	adult	27.45	17.1	10.23	10.04	28.7	11	12.4	11	12.4	7.60061	12.4	1692.06	962.26	459.805	1379.42	919.611
16	Teufelsgraben	Posidonia shale	Acrocoelitidae	Dactyloteuthis	hebetata	Toarcian	variabilis	CK-15	SNSB-BSPG 2018 IX 16	adult	40.7	21.24	12.71	10.92				12.5	14.7	9.03277	14.7	3842.91	1459.78	771.776	2315.33	1543.55
19	Teufelsgraben	Posidonia shale	Acrocoelitidae	Dactyloteuthis	hebetata	Toarcian	variabilis	CK-15	SNSB-BSPG 2018 IX 17	juvenile	31.1	19.53	6.76	6.72				7.9	7.2	6.05321	7.9	854.39	409.43	232.267	696.8	464.533
20	Teufelsgraben	Posidonia shale	Acrocoelitidae	Dactyloteuthis	hebetata	Toarcian	variabilis	CK-15	SNSB-BSPG 2018 IX 18	juvenile	28	17.4	6.73	6.64				6.8	7	5.79283	7	766.26	434.83	203.564	610.692	407.128
21	Teufelsgraben	Posidonia shale	Acrocoelitidae	Dactyloteuthis	hebetata	Toarcian	variabilis	CK-15	SNSB-BSPG 2018 IX 19	juvenile	28.14	18.81	8.1	6.72	29	8.14	8.14	8.14	8.14	6.34933	8.14	774.58	592.39	268.047	804.142	536.095
22	Teufelsgraben	Posidonia shale	Acrocoelitidae	Dactyloteuthis	hebetata	Toarcian	variabilis	CK-15	SNSB-BSPG 2018 IX 20	juvenile	19.94	15.4	6.36	6.16	20.1	6.4	6.5	6.4	6.5	5.32312	6.5	443.02	294.48	157.953	473.858	315.905
23	Teufelsgraben	Posidonia shale	Acrocoelitidae	Dactyloteuthis	hebetata	Toarcian	variabilis	CK-15	SNSB-BSPG 2018 IX 21	juvenile	22.62	13.33	7.58	7.01	20.6	4.4	5.4	4.4	5.4	5.61547	7.58	528.71	391.19	185.433	556.298	370.865
17	Teufelsgraben	Posidonia shale	Acrocoelitidae	Dactyloteuthis	digitalis	Toarcian	variabilis	CK-15	SNSB-BSPG 2018 IX 22	juvenile					23.2	11.4	9.8				11.4
18	Teufelsgraben	Posidonia shale	Acrocoelitidae	Dactyloteuthis	digitalis	Toarcian	variabilis	CK-15	SNSB-BSPG 2018 IX 23	juvenile	40.6	20.59	9.25	8.29				10.4	10.1	7.33552	10.4	2154.32	907.56	413.353	1240.06	826.706
3	Teufelsgraben	Posidonia shale	Acrocoelitidae	Dactyloteuthis	digitalis	Toarcian	variabilis	CK-15	SNSB-BSPG 2018 IX 24	juvenile					18.28	6.9	6.1				6.9
34	Teufelsgraben	Posidonia shale	Acrocoelitidae	Dactyloteuthis	digitalis	Toarcian	variabilis	CK-15	SNSB-BSPG 2018 IX 25	adult	51.5	25.6	14	11.5				13.3	12.4	10.1003	14	4019.59	2156.57	1079.03	3237.1	2158.06
35	Teufelsgraben	Posidonia shale	Acrocoelitidae	Dactyloteuthis	digitalis	Toarcian	variabilis	CK-15	SNSB-BSPG 2018 IX 26	adult	38.6	17.1	16.6	12.4				17.3	14	9.58272	17.3	5406.27	2268.53	921.498	2764.49	1843
36	Teufelsgraben	Posidonia shale	Acrocoelitidae	Dactyloteuthis	digitalis	Toarcian	variabilis	CK-15	SNSB-BSPG 2018 IX 27	adult	53.4	22.1	17.9	13.7				19.5	15.2	11.0654	19.5	9079.32	3750.31	1418.84	4256.53	2837.69
37	Teufelsgraben	Posidonia shale	Acrocoelitidae	Dactyloteuthis	digitalis	Toarcian	variabilis	CK-15	SNSB-BSPG 2018 IX 28	adult	47.9	20	13.8	9.7				16.4	13.3	8.74729	16.4	6522.03	2621.88	700.889	2102.67	1401.78
38	Teufelsgraben	Posidonia shale	Acrocoelitidae	Dactyloteuthis	digitalis	Toarcian	variabilis	CK-15	SNSB-BSPG 2018 IX 29	adult	56.2	32.9	17	12.7				18.9	14.4	12.1096	18.9	6913.24	2858.65	1859.59	5578.77	3719.18
39	Teufelsgraben	Posidonia shale	Acrocoelitidae	Dactyloteuthis	digitalis	Toarcian	variabilis	CK-15	SNSB-BSPG 2018 IX 30	adult	55.7	32.5	16.8	12.7				17.7	15	12.0128	17.7	6965.17	4201.46	1815.37	5446.11	3630.74
40	Teufelsgraben	Posidonia shale	Acrocoelitidae	Dactyloteuthis	digitalis	Toarcian	variabilis	CK-15	SNSB-BSPG 2018 IX 31	adult	57.8	29.77	17.98	13.5				18.4	14.8	12.1791	18.4	9491.07	4072.13	1891.78	5675.34	3783.56
41	Teufelsgraben	Posidonia shale	Acrocoelitidae	Dactyloteuthis	digitalis	Toarcian	variabilis	CK-15	SNSB-BSPG 2018 IX 32	adult	58.3	30.58	17.72	13.71				18.6	14.6	12.2921	18.6	9749.36	4102.61	1944.94	5834.83	3889.89
42	Teufelsgraben	Posidonia shale	Acrocoelitidae	Dactyloteuthis	digitalis	Toarcian	variabilis	CK-15	SNSB-BSPG 2018 IX 33	adult	58.4							17.3	12.3		17.3	7555.13	1886.56
43	Teufelsgraben	Posidonia shale	Acrocoelitidae	Dactyloteuthis	digitalis	Toarcian	variabilis	CK-15	SNSB-BSPG 2018 IX 34	adult	50.95	31.2	18.2	13.84	51.9	18.3	14.4	18.3	14.4	12.5247	18.3	8401.98	4448.77	2057.46	6172.37	4114.91
44	Teufelsgraben	Posidonia shale	Acrocoelitidae	Dactyloteuthis	digitalis	Toarcian	variabilis	CK-15	SNSB-BSPG 2018 IX 35	adult	41.83	30.62	17.19	12.15	42.2	16.9	12.8			11.6932	17.19	5481.09	3661.98	1674.27	5022.82	3348.54
45	Teufelsgraben	Posidonia shale	Acrocoelitidae	Dactyloteuthis	digitalis	Toarcian	variabilis	CK-15	SNSB-BSPG 2018 IX 36	adult	40.68	23.19	16.19	12.77	41.3	16.8	14			10.6225	16.8	5675.1	2714.44	1255.18	3765.55	2510.37
46	Teufelsgraben	Posidonia shale	Acrocoelitidae	Dactyloteuthis	digitalis	Toarcian	variabilis	CK-15	SNSB-BSPG 2018 IX 37	adult	45.1	19.44	13.66	10.53				13.9	12.1	8.87507	13.9	4716.85	1698.44	732.055	2196.17	1464.11
47	Teufelsgraben	Posidonia shale	Acrocoelitidae	Dactyloteuthis	digitalis	Toarcian	variabilis	CK-15	SNSB-BSPG 2018 IX 38	juvenile	30.7	18.5	12.95	10.4	32.7	13.8	11.2			8.54027	13.8	2692.9	1261.08	652.294	1956.88	1304.59
48	Teufelsgraben	Posidonia shale	Acrocoelitidae	Dactyloteuthis	digitalis	Toarcian	variabilis	CK-15	SNSB-BSPG 2018 IX 39	adult	34.39	22.14	14.6	7.96	35.7	15.2	7,8?			8.63233	15.2	2644.98	1615.54	673.616	2020.85	1347.23
49	Teufelsgraben	Posidonia shale	Acrocoelitidae	Dactyloteuthis	digitalis	Toarcian	variabilis	CK-15	SNSB-BSPG 2018 IX 40	adult	37.1	16.85	12	9.58				11.8	11	7.85288	12	3083.02	1336.12	507.125	1521.38	1014.25
50	Teufelsgraben	Posidonia shale	Acrocoelitidae	Dactyloteuthis	digitalis	Toarcian	variabilis	CK-15	SNSB-BSPG 2018 IX 41	adult	45.11	31.48	19.18	12.56	46.2	20.4	13.6	20.4	13.6	12.3767	20.4	6782.08	4287.67	1985.37	5956.11	3970.74
51	Teufelsgraben	Posidonia shale	Acrocoelitidae	Dactyloteuthis	digitalis	Toarcian	variabilis	CK-15	SNSB-BSPG 2018 IX 42	adult	52.5	30.24	14.22	9.91				14.2	10.6	10.2133	14.22	4890.6	2486.91	1115.64	3346.92	2231.28
52	Teufelsgraben	Posidonia shale	Acrocoelitidae	Dactyloteuthis	digitalis	Toarcian	variabilis	CK-15	SNSB-BSPG 2018 IX 43	juvenile	36.4	19.15	10.51	8.83				11.6	10.4	7.63058	11.6	2173.95	993.71	465.265	1395.8	930.531
53	Teufelsgraben	Posidonia shale	Acrocoelitidae	Dactyloteuthis	digitalis	Toarcian	variabilis	CK-15	SNSB-BSPG 2018 IX 44	adult	39.45	33.92	17.16	13.44	40.8	17.5	13.6			12.5056	17.5	5400.22	4334.35	2048.05	6144.16	4096.1
54	Teufelsgraben	Posidonia shale	Acrocoelitidae	Dactyloteuthis	digitalis	Toarcian	variabilis	CK-15	SNSB-BSPG 2018 IX 45	adult	45.4	26.34	15.61	12.11				16.5	13.4	10.7572	16.5	5658.07	2861.46	1303.56	3910.68	2607.12
55	Teufelsgraben	Posidonia shale	Acrocoelitidae	Dactyloteuthis	digitalis	Toarcian	variabilis	CK-15	SNSB-BSPG 2018 IX 46	adult	43.6	20.79	13.31	10.89				15.6	12.8	9.09914	15.6	4520	1750.95	788.913	2366.74	1577.83
56	Teufelsgraben	Posidonia shale	Acrocoelitidae	Dactyloteuthis	digitalis	Toarcian	variabilis	CK-15	SNSB-BSPG 2018 IX 47	adult	45.3	18.7	9.6	11.2				8.5	13.4	7.95103	13.4			526.38	1579.14	1052.76
57	Teufelsgraben	Posidonia shale	Acrocoelitidae	Dactyloteuthis	digitalis	Toarcian	variabilis	CK-15	SNSB-BSPG 2018 IX 48	juvenile	42.1	20.92	11.37	9.92				11.2	10.1	8.3867	11.37	2857.92	1325.79	617.735	1853.21	1235.47
58	Teufelsgraben	Posidonia shale	Acrocoelitidae	Dactyloteuthis	digitalis	Toarcian	variabilis	CK-15	SNSB-BSPG 2018 IX 49	juvenile	36.5							9.9	8.8		9.9
59	Teufelsgraben	Posidonia shale	Acrocoelitidae	Dactyloteuthis	digitalis	Toarcian	variabilis	CK-15	SNSB-BSPG 2018 IX 50	juvenile	29.45	22.83	9.88	8.26	29.6	10.2	8.5			7.75165	10.2	1467.44	1012.1	487.766	1463.3	975.532
60	Teufelsgraben	Posidonia shale	Acrocoelitidae	Dactyloteuthis	digitalis	Toarcian	variabilis	CK-15	SNSB-BSPG 2018 IX 51	juvenile	25.86	17.87	9.04	7.31	27.4	10.1	7.9			6.65861	10.1	1050.78	743.71	309.157	927.471	618.314
63	Teufelsgraben	Posidonia shale	Acrocoelitidae	Dactyloteuthis	digitalis	Toarcian	variabilis	CK-15	SNSB-BSPG 2018 IX 52	adult					42.9	20.7	15.2				20.7
64	Teufelsgraben	Posidonia shale	Acrocoelitidae	Dactyloteuthis	digitalis	Toarcian	variabilis	CK-15	SNSB-BSPG 2018 IX 53	adult		34.2	14.61	12.69	35.4	15.4	12.7			11.6598	15.4	3813.55	3116.63	1659.99	4979.98	3319.99
65	Teufelsgraben	Posidonia shale	Acrocoelitidae	Dactyloteuthis	digitalis	Toarcian	variabilis	CK-15	SNSB-BSPG 2018 IX 54	adult		35.8	15.1	11.7						11.6501	15.1	3586.68	3552.12	1655.83	4967.48	3311.65
66	Teufelsgraben	Posidonia shale	Acrocoelitidae	Dactyloteuthis	digitalis	Toarcian	variabilis	CK-15	SNSB-BSPG 2018 IX 55	juvenile					27.5	11.9	7.9				11.9
67	Teufelsgraben	Posidonia shale	Acrocoelitidae	Dactyloteuthis	digitalis	Toarcian	variabilis	CK-15	SNSB-BSPG 2018 IX 56	juvenile	31.85	19.5	13.15	8.56	32.8	13.3	9			8.187	13.3	2415.05	1348.99	574.649	1723.95	1149.3
68	Teufelsgraben	Posidonia shale	Acrocoelitidae	Dactyloteuthis	digitalis	Toarcian	variabilis	CK-15	SNSB-BSPG 2018 IX 57	adult					44.4	19.1	15.4				19.1
69	Teufelsgraben	Posidonia shale	Acrocoelitidae	Dactyloteuthis	digitalis	Toarcian	variabilis	CK-15	SNSB-BSPG 2018 IX 58	adult					42.1	19.1	17.3				19.1
70	Teufelsgraben	Posidonia shale	Acrocoelitidae	Dactyloteuthis	digitalis	Toarcian	variabilis	CK-15	SNSB-BSPG 2018 IX 59	adult					40.2	18.2	13.5				18.2
71	Teufelsgraben	Posidonia shale	Acrocoelitidae	Dactyloteuthis	digitalis	Toarcian	variabilis	CK-15	SNSB-BSPG 2018 IX 60	adult					31.5	17.4	13.4				17.4
72	Teufelsgraben	Posidonia shale	Acrocoelitidae	Dactyloteuthis	digitalis	Toarcian	variabilis	CK-15	SNSB-BSPG 2018 IX 61	adult					27.3	17.2	12.5				17.2
73	Teufelsgraben	Posidonia shale	Acrocoelitidae	Dactyloteuthis	digitalis	Toarcian	variabilis	CK-15	SNSB-BSPG 2018 IX 62	adult					29.1	16.5	12.7				16.5
74	Teufelsgraben	Posidonia shale	Acrocoelitidae	Dactyloteuthis	digitalis	Toarcian	variabilis	CK-15	SNSB-BSPG 2018 IX 63	adult					27.4	17.7	11.6				17.7
75	Teufelsgraben	Posidonia shale	Acrocoelitidae	Dactyloteuthis	digitalis	Toarcian	variabilis	CK-15	SNSB-BSPG 2018 IX 64	adult					30.8	16.3	11.8				16.3
76	Teufelsgraben	Posidonia shale	Acrocoelitidae	Dactyloteuthis	digitalis	Toarcian	variabilis	CK-15	SNSB-BSPG 2018 IX 65	adult					30.4	14.5	10.3				14.5
77	Teufelsgraben	Posidonia shale	Acrocoelitidae	Dactyloteuthis	digitalis	Toarcian	variabilis	CK-15	SNSB-BSPG 2018 IX 66	adult			18.9	14.2	22.5						18.9
78	Teufelsgraben	Posidonia shale	Acrocoelitidae	Dactyloteuthis	digitalis	Toarcian	variabilis	CK-15	SNSB-BSPG 2018 IX 67	adult					29	17	12.8				17
79	Teufelsgraben	Posidonia shale	Acrocoelitidae	Dactyloteuthis	digitalis	Toarcian	variabilis	CK-15	SNSB-BSPG 2018 IX 68	adult			15.4	12.8	31.4			19.7	13.2		19.7
80	Teufelsgraben	Posidonia shale	Acrocoelitidae	Dactyloteuthis	digitalis	Toarcian	variabilis	CK-15	SNSB-BSPG 2018 IX 69	adult					27.3	15.9	11.7				15.9
81	Teufelsgraben	Posidonia shale	Acrocoelitidae	Dactyloteuthis	digitalis	Toarcian	variabilis	CK-15	SNSB-BSPG 2018 IX 70	adult					33.9			17.1	13.9		17.1
82	Teufelsgraben	Posidonia shale	Acrocoelitidae	Dactyloteuthis	digitalis	Toarcian	variabilis	CK-15	SNSB-BSPG 2018 IX 71	adult					25.2	19.3	12.9				19.3
83	Teufelsgraben	Posidonia shale	Acrocoelitidae	Dactyloteuthis	digitalis	Toarcian	variabilis	CK-15	SNSB-BSPG 2018 IX 72	adult					14.5	12.6	8.5				12.6
84	Teufelsgraben	Posidonia shale	Acrocoelitidae	Dactyloteuthis	digitalis	Toarcian	variabilis	CK-15	SNSB-BSPG 2018 IX 73	adult					20.1	19.4	15.5				19.4
85	Teufelsgraben	Posidonia shale	Acrocoelitidae	Dactyloteuthis	digitalis	Toarcian	variabilis	CK-15	SNSB-BSPG 2018 IX 74	adult					32	16.6	13.3				16.6
33	Teufelsgraben	Posidonia shale	Acrocoelitidae	Dactyloteuthis	similis	Toarcian	variabilis	CK-15	SNSB-BSPG 2018 IX 75	adult	61.2	30.44	14.47	11.17				14.2	16.6	10.7144	16.6	7270.64	2953.79	1288.06	3864.17	2576.11
62	Teufelsgraben	Posidonia shale	Acrocoelitidae	Dactyloteuthis	incurvata	Toarcian	variabilis	CK-15	SNSB-BSPG 2018 IX 76	adult	71.5	28.87	14.52	12.22				22.4	14.4	10.8595	22.4	10314.3	3081.89	1341.08	4023.23	2682.15
24	Teufelsgraben	Posidonia shale	Acrocoelitidae	Acrocoelites (O.)	subbrevis	Toarcian	variabilis	CK-15	SNSB-BSPG 2018 IX 77	juvenile	26.9							9	8.5		9
25	Teufelsgraben	Posidonia shale	Acrocoelitidae	Acrocoelites (O.)	subbrevis	Toarcian	variabilis	CK-15	SNSB-BSPG 2018 IX 78	adult					32.9	12	11.9				12
27	Teufelsgraben	Posidonia shale	Acrocoelitidae	Acrocoelites (O.)	pyramidalis	Toarcian	variabilis	CK-15	SNSB-BSPG 2018 IX 79	juvenile					27.9	9.4	8.7				9.4
86	Teufelsgraben	Posidonia shale	Acrocoelitidae	Acrocoelites (O.)	pyramidalis	Toarcian	variabilis	CK-15	SNSB-BSPG 2018 IX 80	juvenile
28	Teufelsgraben	Posidonia shale	Acrocoelitidae	Acrocoelites (A.)	quenstedi	Toarcian	variabilis	CK-15	SNSB-BSPG 2018 IX 81	adult		70.3	15.3	13.2						15.2541	15.3	7680.59	7680.59	3716.97	11150.9	7433.94
26	Teufelsgraben	Posidonia shale	Acrocoelitidae	Acrocoelites	sp.	Toarcian	variabilis	CK-15	SNSB-BSPG 2018 IX 82	adult					33.9	15.9	12.5				15.9
29	Teufelsgraben	Posidonia shale	Acrocoelitidae	Acrocoelites	sp.	Toarcian	variabilis	CK-15	SNSB-BSPG 2018 IX 83	adult					38.8	12.8	10.7				12.8
30	Teufelsgraben	Posidonia shale	Acrocoelitidae	Acrocoelites	sp.	Toarcian	variabilis	CK-15	SNSB-BSPG 2018 IX 84	juvenile					16.2	4.7	4.5				4.7
31	Teufelsgraben	Posidonia shale	Acrocoelitidae	Acrocoelites	sp.	Toarcian	variabilis	CK-15	SNSB-BSPG 2018 IX 85	adult					22.8	11	9				11
32	Teufelsgraben	Posidonia shale	Acrocoelitidae	Acrocoelites	sp.	Toarcian	variabilis	CK-15	SNSB-BSPG 2018 IX 86	juvenile					18.1	8.5	7.6				8.5
87	Teufelsgraben	Posidonia shale	Acrocoelitidae	Acrocoelites	sp.	Toarcian	variabilis	CK-15	SNSB-BSPG 2018 IX 87	juvenile	14.53	9.65	3.05	3.03						2.81451	3.05	88.34	54.04	23.3474	70.0422	46.6948
88	Teufelsgraben	Posidonia shale	Acrocoelitidae	Acrocoelites	sp.	Toarcian	variabilis	CK-15	SNSB-BSPG 2018 IX 88	juvenile	11.82	8.4	2.56	2.33						2.32241	2.56	46.03	31.67	13.1173	39.3518	26.2346
89	Teufelsgraben	Posidonia shale	Acrocoelitidae	Acrocoelites	sp.	Toarcian	variabilis	CK-15	SNSB-BSPG 2018 IX 89	juvenile	13.96	9.15	2.99	2.93						2.71623	2.99	78.51	53.75	20.9859	62.9578	41.9719
90	Teufelsgraben	Posidonia shale	Acrocoelitidae	Acrocoelites	sp.	Toarcian	variabilis	CK-15	SNSB-BSPG 2018 IX 90	juvenile	12.23	9.18	3.69	3.54						3.1065	3.69	96.7	71.07	31.3936	94.1808	62.7872
91	Teufelsgraben	Posidonia shale	Acrocoelitidae	Acrocoelites	sp.	Toarcian	variabilis	CK-15	SNSB-BSPG 2018 IX 91	juvenile	12.41	8.71	2.81	2.59						2.51182	2.81	58.39	39.3	16.5956	49.7868	33.1912
92	Teufelsgraben	Posidonia shale	Acrocoelitidae	Acrocoelites	sp.	Toarcian	variabilis	CK-15	SNSB-BSPG 2018 IX 92	juvenile	12.31	8.66	3.49	3.42						2.95645	3.49	84.79	52.61	27.0606	81.1819	54.1213
93	Teufelsgraben	Posidonia shale	Acrocoelitidae	Acrocoelites	sp.	Toarcian	variabilis	CK-15	SNSB-BSPG 2018 IX 93	juvenile		12.14	3.83	3.33						3.38273	3.83	80.66	80.66	40.535	121.605	81.07
94	Teufelsgraben	Posidonia shale	Acrocoelitidae	Acrocoelites	sp.	Toarcian	variabilis	CK-15	SNSB-BSPG 2018 IX 94	juvenile	16.1	10.74	3.66	3.46						3.23967	3.66	114.51	87.44	35.6066	106.82	71.2131
95	Teufelsgraben	Posidonia shale	Acrocoelitidae	Acrocoelites	sp.	Toarcian	variabilis	CK-15	SNSB-BSPG 2018 IX 95	juvenile	19.63	13.48	3.9	3.66						3.63685	3.9	193.19	130.61	50.3737	151.121	100.747
96	Teufelsgraben	Posidonia shale	Acrocoelitidae	Acrocoelites	sp.	Toarcian	variabilis	CK-15	SNSB-BSPG 2018 IX 96	juvenile	17.73	12.27	3.76	3.76						3.51334	3.76	171.61	99.66	45.4139	136.242	90.8278
97	Teufelsgraben	Posidonia shale	Acrocoelitidae	Acrocoelites	sp.	Toarcian	variabilis	CK-15	SNSB-BSPG 2018 IX 97	juvenile	19.11	15.11	5.06	4.96						4.5598	5.06	230.86	182.78	99.2808	297.842	198.562
98	Teufelsgraben	Posidonia shale	Acrocoelitidae	Acrocoelites	sp.	Toarcian	variabilis	CK-15	SNSB-BSPG 2018 IX 98	juvenile	19.32	16.19	4.17	3.81						4.00635	4.17	228	197.14	67.3405	202.022	134.681
99	Teufelsgraben	Posidonia shale	Acrocoelitidae	Acrocoelites	sp.	Toarcian	variabilis	CK-15	SNSB-BSPG 2018 IX 99	juvenile	20.97	13.72	4.26	4.26						3.96313	4.26	238.93	141.35	65.1841	195.552	130.368
100	Teufelsgraben	Posidonia shale	Acrocoelitidae	Acrocoelites	sp.	Toarcian	variabilis	CK-15	SNSB-BSPG 2018 IX 100	juvenile	23.01	14.96	6.16	6.07						5.19055	6.16	469.55	274.23	146.443	439.33	292.887
101	Teufelsgraben	Posidonia shale	Acrocoelitidae	Acrocoelites	sp.	Toarcian	variabilis	CK-15	SNSB-BSPG 2018 IX 101	juvenile	25.14	18.94	4.78	4.53						4.68039	4.78	377.97	262.7	107.368	322.104	214.736
102	Teufelsgraben	Posidonia shale	Acrocoelitidae	Acrocoelites	sp.	Toarcian	variabilis	CK-15	SNSB-BSPG 2018 IX 102	juvenile	21.53	16.36	4.43	4.05						4.18659	4.43	262.25	184.49	76.8441	230.532	153.688
103	Teufelsgraben	Posidonia shale	Acrocoelitidae	Acrocoelites	sp.	Toarcian	variabilis	CK-15	SNSB-BSPG 2018 IX 103	juvenile	20.41	16.76	4.52	4.44						4.38105	4.52	290.78	237.46	88.057	264.171	176.114
104	Teufelsgraben	Posidonia shale	Acrocoelitidae	Acrocoelites	sp.	Toarcian	variabilis	CK-15	SNSB-BSPG 2018 IX 104	juvenile	33.03	18.55	5.74	5.27						5.196	5.74	731.29	362.66	146.904	440.713	293.809
105	Teufelsgraben	Posidonia shale	Acrocoelitidae	Acrocoelites	sp.	Toarcian	variabilis	CK-15	SNSB-BSPG 2018 IX 105	juvenile	32.83	23.8	6.79	6.33						6.34741	6.79	780.53	507.54	267.805	803.416	535.61
106	Teufelsgraben	Posidonia shale	Acrocoelitidae	Acrocoelites	sp.	Toarcian	variabilis	CK-15	SNSB-BSPG 2018 IX 106	juvenile	24.71	15.71	4.63	4.49						4.33825	4.63	317.74	221.79	85.5012	256.504	171.002
107	Teufelsgraben	Posidonia shale	Acrocoelitidae	Acrocoelites	sp.	Toarcian	variabilis	CK-15	SNSB-BSPG 2018 IX 107	juvenile	20.47	15.93	4.03	3.94						3.984	4.03	198.91	146.59	66.2195	198.658	132.439
108	Teufelsgraben	Posidonia shale	Acrocoelitidae	Acrocoelites	sp.	Toarcian	variabilis	CK-15	SNSB-BSPG 2018 IX 108	juvenile	21.27	15.36	4.34	4.31						4.15687	4.34	256.91	154.92	75.2189	225.657	150.438
109	Teufelsgraben	Posidonia shale	Acrocoelitidae	Acrocoelites	sp.	Toarcian	variabilis	CK-15	SNSB-BSPG 2018 IX 109	juvenile	12.8	8.44	3.53	3.47						2.95662	3.53	86.97	58.91	27.0655	81.1964	54.1309
110	Teufelsgraben	Posidonia shale	Acrocoelitidae	Acrocoelites	sp.	Toarcian	variabilis	CK-15	SNSB-BSPG 2018 IX 110	juvenile	11.62	7.89	2.68	2.62						2.40151	2.68	50.44	32.43	14.5038	43.5114	29.0076
111	Teufelsgraben	Posidonia shale	Acrocoelitidae	Acrocoelites	sp.	Toarcian	variabilis	CK-15	SNSB-BSPG 2018 IX 111	juvenile	30.59	19.34	6.25	6.2						5.72211	6.25	841.92	444.97	196.199	588.597	392.398
1	Buttenheim	Posidonia shale	Passaloteuthididae	Passaloteuthis	bisulcata	Toarcian	Lowermost Toarcian	BT1	SNSB-BSPG 2018 X 1	adult	111	66.76	15.64	15.2						15.8311	15.64	16368.5	8276.54	4154.95	12464.8	8309.89
2	Buttenheim	Posidonia shale	Passaloteuthididae	Passaloteuthis	bisulcata	Toarcian	Lowermost Toarcian	BT1	SNSB-BSPG 2018 X 2	adult	117	79.49	14.82	14.5						16.2239	14.82	17872.8	10820.4	4471.95	13415.9	8943.91
3	Buttenheim	Posidonia shale	Passaloteuthididae	Passaloteuthis	bisulcata	Toarcian	Lowermost Toarcian	BT1	SNSB-BSPG 2018 X 3	adult	102	61.13	16.15	15.94						15.7865	16.15	19568	9241.44	4119.87	12359.6	8239.75
4	Buttenheim	Posidonia shale	Passaloteuthididae	Passaloteuthis	bisulcata	Toarcian	Lowermost Toarcian	BT1	SNSB-BSPG 2018 X 4	adult	118.4	68.62	15.77	15.55						16.143	15.77	21099.8	11415.8	4405.36	13216.1	8810.72
5	Buttenheim	Posidonia shale	Passaloteuthididae	Passaloteuthis	bisulcata	Toarcian	Lowermost Toarcian	BT1	SNSB-BSPG 2018 X 5	adult	104	66.64	14.71	14.58						15.2879	14.71		8149.22	3741.74	11225.2	7483.48
6	Buttenheim	Posidonia shale	Passaloteuthididae	Passaloteuthis	bisulcata	Toarcian	Lowermost Toarcian	BT1	SNSB-BSPG 2018 X 6	adult	103.1	63.7	16.73	16.1						16.248	16.73	18144.4	9692.48	4491.9	13475.7	8983.8
7	Buttenheim	Posidonia shale	Passaloteuthididae	Passaloteuthis	bisulcata	Toarcian	Lowermost Toarcian	BT1	SNSB-BSPG 2018 X 7	adult	126	87	17	16						18.086	17	17180.8	12628.9	6195.22	18585.7	12390.4
8	Buttenheim	Posidonia shale	Passaloteuthididae	Passaloteuthis	bisulcata	Toarcian	Lowermost Toarcian	BT1	SNSB-BSPG 2018 X 8	adult	88.39	70.64	16.82	14.32	92	17	15			16.2027	17		11126.8	4454.39	13363.2	8908.78
9	Buttenheim	Posidonia shale	Passaloteuthididae	Passaloteuthis	bisulcata	Toarcian	Lowermost Toarcian	BT1	SNSB-BSPG 2018 X 9	juvenile	57.9	41.2	11.53	13.1						11.5872	13.1			1629.17	4887.51	3258.34
10	Buttenheim	Posidonia shale	Passaloteuthididae	Passaloteuthis	bisulcata	Toarcian	Lowermost Toarcian	BT1	SNSB-BSPG 2018 X 10	juvenile	59												1877.65
11	Buttenheim	Posidonia shale	Passaloteuthididae	Passaloteuthis	bisulcata	Toarcian	Lowermost Toarcian	BT1	SNSB-BSPG 2018 X 11	juvenile	75	60.51	11.01	10.52						12.0556	11.01	5604.19	3862.02	1834.84	5504.53	3669.69
12	Buttenheim	Posidonia shale	Passaloteuthididae	Passaloteuthis	bisulcata	Toarcian	Lowermost Toarcian	BT1	SNSB-BSPG 2018 X 12	juvenile	34.77	26.37	6.67	6.09	34	7	6			6.44562	7	892.22	624.81	280.428	841.285	560.857
13	Buttenheim	Posidonia shale	Passaloteuthididae	Passaloteuthis	bisulcata	Toarcian	Lowermost Toarcian	BT1	SNSB-BSPG 2018 X 13	juvenile					18	6	6				6
14	Buttenheim	Posidonia shale	Passaloteuthididae	Passaloteuthis	bisulcata	Toarcian	Lowermost Toarcian	BT1	SNSB-BSPG 2018 X 14	juvenile	41	26.85	6.96	6.65						6.77285	6.96	1069.05	582.29	325.345	976.034	650.689
15	Buttenheim	Posidonia shale	Passaloteuthididae	Passaloteuthis	bisulcata	Toarcian	Lowermost Toarcian	BT1	SNSB-BSPG 2018 X 15	juvenile					18	6	5				6
16	Buttenheim	Posidonia shale	Passaloteuthididae	Passaloteuthis	bisulcata	Toarcian	Lowermost Toarcian	BT1	SNSB-BSPG 2018 X 16	juvenile	51	40	9	10						9.65489	10	2246.99	1571.93	942.478	2827.43	1884.96
17	Buttenheim	Posidonia shale	Passaloteuthididae	Passaloteuthis	bisulcata	Toarcian	Lowermost Toarcian	BT1	SNSB-BSPG 2018 X 17	juvenile					22	6	6				6
18	Buttenheim	Posidonia shale	Passaloteuthididae	Passaloteuthis	bisulcata	Toarcian	Lowermost Toarcian	BT1	SNSB-BSPG 2018 X 18	juvenile	47.17	29.94	8.87	8.24						8.17864	8.87	2600.8	1202.34	572.89	1718.67	1145.78
19	Buttenheim	Posidonia shale	Passaloteuthididae	Passaloteuthis	bisulcata	Toarcian	Lowermost Toarcian	BT1	SNSB-BSPG 2018 X 19	juvenile	17	13.17	4.53	4.53						4.07293	4.53	246.88	124.44	70.754	212.262	141.508
20	Buttenheim	Posidonia shale	Passaloteuthididae	Passaloteuthis	bisulcata	Toarcian	Lowermost Toarcian	BT1	SNSB-BSPG 2018 X 20	juvenile	37	23.01	5.81	5.76						5.77411	5.81	765.11	407.46	201.597	604.791	403.194
21	Buttenheim	Posidonia shale	Passaloteuthididae	Passaloteuthis	bisulcata	Toarcian	Lowermost Toarcian	BT1	SNSB-BSPG 2018 X 21	juvenile					13	5	4				5
22	Buttenheim	Posidonia shale	Passaloteuthididae	Passaloteuthis	bisulcata	Toarcian	Lowermost Toarcian	BT1	SNSB-BSPG 2018 X 22	juvenile					13	5	5				5
49	Buttenheim	Posidonia shale	Passaloteuthididae	Passaloteuthis	bisulcata	Toarcian	Lowermost Toarcian	BT1	SNSB-BSPG 2018 X 23	adult	95.6	67.63	13.58	12.39						14.1694	13.58	8690.12	5231	2979.06	8937.18	5958.12
50	Buttenheim	Posidonia shale	Passaloteuthididae	Passaloteuthis	bisulcata	Toarcian	Lowermost Toarcian	BT1	SNSB-BSPG 2018 X 24	adult	84.4	63.08	15.62	15.28						15.5553	15.62	11937.2	7422.13	3941.53	11824.6	7883.06
51	Buttenheim	Posidonia shale	Passaloteuthididae	Passaloteuthis	bisulcata	Toarcian	Lowermost Toarcian	BT1	SNSB-BSPG 2018 X 25	adult	78.4	64.49	15	14.51						15.196	15	10605.6	8625.27	3674.68	11024	7349.36
71	Buttenheim	Posidonia shale	Passaloteuthididae	Passaloteuthis	bisulcata	Toarcian	Lowermost Toarcian	BT1	SNSB-BSPG 2018 X 26	adult	66.33	55.12	13.04	12.8						13.2002	13.04	7470.07	5939.36	2408.6	7225.81	4817.21
72	Buttenheim	Posidonia shale	Passaloteuthididae	Passaloteuthis	bisulcata	Toarcian	Lowermost Toarcian	BT1	SNSB-BSPG 2018 X 27	juvenile	67.72	47.23	11.31	11.14						11.4157	11.31	5855.97	3400.75	1557.88	4673.64	3115.76
47	Buttenheim	Posidonia shale	Passaloteuthididae	Passaloteuthis	bisulcata	Toarcian	Lowermost Toarcian	BT1	SNSB-BSPG 2018 X 28	juvenile	32.7	17.99	6.26	6.02						5.5341	6.26	746.45	297.96	177.489	532.466	354.977
37	Buttenheim	Posidonia shale	Passaloteuthididae	Passaloteuthis	milleri	Toarcian	Lowermost Toarcian	BT1	SNSB-BSPG 2018 X 29	juvenile	41	28.48	5.41	5.64						6.01154	5.64	901.83	545.8	227.502	682.506	455.004
53	Buttenheim	Posidonia shale	Passaloteuthididae	Passaloteuthis	milleri	Toarcian	Lowermost Toarcian	BT1	SNSB-BSPG 2018 X 30	juvenile	42.5	36.71	8.8	8.02				9.1	8.7	8.65221	9.1	3429.16	2128.9	678.282	2034.84	1356.56
54	Buttenheim	Posidonia shale	Passaloteuthididae	Passaloteuthis	milleri	Toarcian	Lowermost Toarcian	BT1	SNSB-BSPG 2018 X 31	juvenile		25	6.7	6.4						6.44731	6.7			280.649	841.947	561.298
55	Buttenheim	Posidonia shale	Passaloteuthididae	Passaloteuthis	milleri	Toarcian	Lowermost Toarcian	BT1	SNSB-BSPG 2018 X 32	adult					25	9.5	9.4				9.5
56	Buttenheim	Posidonia shale	Passaloteuthididae	Passaloteuthis	milleri	Toarcian	Lowermost Toarcian	BT1	SNSB-BSPG 2018 X 33	juvenile	32.06				32.2	8	7.3				8	945.97	411.86
57	Buttenheim	Posidonia shale	Passaloteuthididae	Passaloteuthis	milleri	Toarcian	Lowermost Toarcian	BT1	SNSB-BSPG 2018 X 34	juvenile					22.2	7.2	7.1				7.2
58	Buttenheim	Posidonia shale	Passaloteuthididae	Passaloteuthis	milleri	Toarcian	Lowermost Toarcian	BT1	SNSB-BSPG 2018 X 35	juvenile					23.3	7	6.8				7
59	Buttenheim	Posidonia shale	Passaloteuthididae	Passaloteuthis	milleri	Toarcian	Lowermost Toarcian	BT1	SNSB-BSPG 2018 X 36	juvenile					13.5	6.9	5.8				6.9
60	Buttenheim	Posidonia shale	Passaloteuthididae	Passaloteuthis	milleri	Toarcian	Lowermost Toarcian	BT1	SNSB-BSPG 2018 X 37	juvenile					14.7	5.8	5.6				5.8
61	Buttenheim	Posidonia shale	Passaloteuthididae	Passaloteuthis	milleri	Toarcian	Lowermost Toarcian	BT1	SNSB-BSPG 2018 X 38	juvenile					15.4	5.5	5.1				5.5
62	Buttenheim	Posidonia shale	Passaloteuthididae	Passaloteuthis	milleri	Toarcian	Lowermost Toarcian	BT1	SNSB-BSPG 2018 X 39	juvenile					13.5	4.3	4.3				4.3
63	Buttenheim	Posidonia shale	Passaloteuthididae	Passaloteuthis	milleri	Toarcian	Lowermost Toarcian	BT1	SNSB-BSPG 2018 X 40	juvenile					9.4	4.5	4				4.5
38	Buttenheim	Posidonia shale	Passaloteuthididae	Parapassaloteuthis	zieteni	Toarcian	Lowermost Toarcian	BT1	SNSB-BSPG 2018 X 41	adult	23.44				24	9	9				9
39	Buttenheim	Posidonia shale	Passaloteuthididae	Parapassaloteuthis	zieteni	Toarcian	Lowermost Toarcian	BT1	SNSB-BSPG 2018 X 42	juvenile	26	16.74	7.47	8.03						6.30827	8.03	927.69	332.68	262.882	788.645	525.763
40	Buttenheim	Posidonia shale	Passaloteuthididae	Parapassaloteuthis	zieteni	Toarcian	Lowermost Toarcian	BT1	SNSB-BSPG 2018 X 43	juvenile					17	8	8				8
41	Buttenheim	Posidonia shale	Passaloteuthididae	Parapassaloteuthis	zieteni	Toarcian	Lowermost Toarcian	BT1	SNSB-BSPG 2018 X 44	adult	30.44				20	10	10				10
42	Buttenheim	Posidonia shale	Passaloteuthididae	Parapassaloteuthis	zieteni	Toarcian	Lowermost Toarcian	BT1	SNSB-BSPG 2018 X 45	adult	40.4	21.96	9.23	9.5						7.83729	9.5	2443.07	1249.12	504.111	1512.33	1008.22
43	Buttenheim	Posidonia shale	Passaloteuthididae	Parapassaloteuthis	zieteni	Toarcian	Lowermost Toarcian	BT1	SNSB-BSPG 2018 X 46	adult	41	21.73	9.67	9.99						8.06611	9.99	2507.2	1079.82	549.567	1648.7	1099.13
44	Buttenheim	Posidonia shale	Passaloteuthididae	Parapassaloteuthis	zieteni	Toarcian	Lowermost Toarcian	BT1	SNSB-BSPG 2018 X 47	adult	44	23.23	10.37	11.33						8.80371	11.33	3318.37	1258.06	714.54	2143.62	1429.08
33	Buttenheim	Posidonia shale	Passaloteuthididae	Parapassaloteuthis	zieteni	Toarcian	Lowermost Toarcian	BT1	SNSB-BSPG 2018 X 48	adult	36											2158.98	658.9
34	Buttenheim	Posidonia shale	Passaloteuthididae	Passaloteuthis	sp.	Toarcian	Lowermost Toarcian	BT1	SNSB-BSPG 2018 X 49	juvenile	43	30.75	7.3	6.33						7.08224	7.3	1204.88	822.34	371.998	1115.99	743.996
23	Buttenheim	Posidonia shale	Passaloteuthididae	Passaloteuthis	bisulcata	Toarcian	Lowermost Toarcian	BT1	SNSB-BSPG 2018 X 50	adult	105	76.65	17.82	17.29						18.0739	17.82	20510.9	12583.3	6182.78	18548.3	12365.6
24	Buttenheim	Posidonia shale	Passaloteuthididae	Passaloteuthis	bisulcata	Toarcian	Lowermost Toarcian	BT1	SNSB-BSPG 2018 X 51	adult	94.18	61.35	13.14	11.72				11.1	7.8	13.3176	13.14	9824.55	5966.2	2473.47	7420.4	4946.93
25	Buttenheim	Posidonia shale	Passaloteuthididae	Passaloteuthis	bisulcata	Toarcian	Lowermost Toarcian	BT1	SNSB-BSPG 2018 X 52	adult					39	14	14				14
26	Buttenheim	Posidonia shale	Passaloteuthididae	Passaloteuthis	bisulcata	Toarcian	Lowermost Toarcian	BT1	SNSB-BSPG 2018 X 53	adult		65.18	15.92	15.68	66	16	16			15.963	16		9018.35	4259.63	12778.9	8519.26
27	Buttenheim	Posidonia shale	Passaloteuthididae	Passaloteuthis	bisulcata	Toarcian	Lowermost Toarcian	BT1	SNSB-BSPG 2018 X 54	adult	107	70.14	15.96	14.45						15.9319	15.96		11611.6	4234.82	12704.5	8469.64
52	Buttenheim	Posidonia shale	Passaloteuthididae	Passaloteuthis	bisulcata	Toarcian	Lowermost Toarcian	BT1	SNSB-BSPG 2018 X 55	adult	109.7	77.78	16.3	15.88						17.1375	16.3		11311.9	5270.78	15812.3	10541.6
45	Buttenheim	Posidonia shale	Passaloteuthididae	Passaloteuthis sp.	sp.	Toarcian	Lowermost Toarcian	BT1	SNSB-BSPG 2018 X 56	adult	27.47				58	12.4	11.7				12.4
46	Buttenheim	Posidonia shale	Passaloteuthididae	Passaloteuthis sp.	sp.	Toarcian	Lowermost Toarcian	BT1	SNSB-BSPG 2018 X 57	adult	29.16				30	14	12				14
48	Buttenheim	Posidonia shale	Passaloteuthididae	Passaloteuthis sp.	sp.	Toarcian	Lowermost Toarcian	BT1	SNSB-BSPG 2018 X 58	adult	98	71.8	13.95	13.04						14.8356	13.95	11532.6	7712.08	3419.36	10258.1	6838.72
64	Buttenheim	Posidonia shale	Passaloteuthididae	Parapassaloteuthis	zieteni	Toarcian	Lowermost Toarcian	BT1	SNSB-BSPG 2018 X 59	adult			9.7	9.4	20.1	9.3	9.3				9.7
65	Buttenheim	Posidonia shale	Passaloteuthididae	Parapassaloteuthis	zieteni	Toarcian	Lowermost Toarcian	BT1	SNSB-BSPG 2018 X 60	juvenile	26.8	14.37	7.67	6.81				7.7	8.1	5.72506	8.1	812.27	353.33	196.502	589.507	393.005
66	Buttenheim	Posidonia shale	Passaloteuthididae	Parapassaloteuthis	zieteni	Toarcian	Lowermost Toarcian	BT1	SNSB-BSPG 2018 X 61	adult					17.6	10.8	9.9				10.8
67	Buttenheim	Posidonia shale	Passaloteuthididae	Parapassaloteuthis	zieteni	Toarcian	Lowermost Toarcian	BT1	SNSB-BSPG 2018 X 62	juvenile	21.7	9.23	6.08	6.13				7.6	7.4	4.41403	7.6	527.89	156.13	90.0605	270.182	180.121
68	Buttenheim	Posidonia shale	Passaloteuthididae	Parapassaloteuthis	zieteni	Toarcian	Lowermost Toarcian	BT1	SNSB-BSPG 2018 X 63	juvenile	16.2							5.4	5.1		5.4	228.21	94.74
69	Buttenheim	Posidonia shale	Passaloteuthididae	Parapassaloteuthis	zieteni	Toarcian	Lowermost Toarcian	BT1	SNSB-BSPG 2018 X 64	juvenile	22.4	9.85	7.11	7.14				7.5	7.1	5.00013	7.5	638.14	245.46	130.91	392.73	261.82
70	Buttenheim	Posidonia shale	Passaloteuthididae	Parapassaloteuthis	zieteni	Toarcian	Lowermost Toarcian	BT1	SNSB-BSPG 2018 X 65	juvenile	35.56	20.9	8.68	8.98						7.41243	8.98	1650.71	524.94	426.492	1279.48	852.984
28	Buttenheim	Posidonia shale	Passaloteuthididae	Parapassaloteuthis	zieteni	Toarcian	Lowermost Toarcian	BT1	SNSB-BSPG 2018 X 66	juvenile	18.01				18
29	Buttenheim	Posidonia shale	Passaloteuthididae	Parapassaloteuthis	zieteni	Toarcian	Lowermost Toarcian	BT1	SNSB-BSPG 2018 X 67	juvenile	27	13.03	7.42	7.12						5.56232	7.42	1080.04	349.07	180.217	540.652	360.435
30	Buttenheim	Posidonia shale	Passaloteuthididae	Parapassaloteuthis	zieteni	Toarcian	Lowermost Toarcian	BT1	SNSB-BSPG 2018 X 68	adult					29	10	10				10
31	Buttenheim	Posidonia shale	Passaloteuthididae	Parapassaloteuthis	zieteni	Toarcian	Lowermost Toarcian	BT1	SNSB-BSPG 2018 X 69	juvenile		22	9	9						7.63747	9			466.527	1399.58	933.053
32	Buttenheim	Posidonia shale	Passaloteuthididae	Parapassaloteuthis	zieteni	Toarcian	Lowermost Toarcian	BT1	SNSB-BSPG 2018 X 70	juvenile	17.35				17	8	9				9
35	Buttenheim	Posidonia shale	Passaloteuthididae	Passaloteuthis	bisulcata	Toarcian	Lowermost Toarcian	BT1	SNSB-BSPG 2018 X 71	juvenile	57	35.45	9.46	9.32						9.2106	9.46	3483.08	2150.59	818.261	2454.78	1636.52
36	Buttenheim	Posidonia shale	Passaloteuthididae	Passaloteuthis	bisulcata	Toarcian	Lowermost Toarcian	BT1	SNSB-BSPG 2018 X 72	adult	127.43	76.79	19.71	18.45						19.1121	19.71	34747.1	19939.7	7310.65	21932	14621.3

## Sheet: Table S1 - Scans info
section	specimem	voxel size (µm)	numer of images	averaging	voltage (kv)	current (µA)	filter (mm Cu)
bt1	67	33.8	800	5	190	170	0.5
TG	2	44.1	800	5	190	230	0.5
TG	4	37.73	800	5	190	190	0.5
TG	7	37.73	800	5	190	190	0.5
TG	8	43.22	800	5	190	220	0.5
TG	9	35.23	800	5	190	180	0.5
TG	10	43.22	800	5	190	220	0.5
TG	15	43.22	800	5	190	220	0.5
TG	20	33.8	800	5	190	170	0.5
TG	21	33.8	800	5	190	170	0.5
TG	22	33.8	800	5	190	170	0.5
TG	23	33.8	800	5	190	170	0.5
TG	19	34.8	900	5	180	190	0.5
TG	87	30.82	700	5	180	170	0.5
TG	90	34.33	800	5	180	190	0.5
TG	92	21.24	700	5	170	120	0.5
TG	94	34.3	800	5	180	190	0.5
TG	95	32.51	900	5	180	180	0.5
TG	96	33.81	900	5	120	280	0.5
TG	97	28.76	1000	5	170	160	0.5
TG	98	32.51	900	5	180	180	0.5
TG	99	32.7	900	5	170	190	0.5
TG	100	37.1	900	5	130	280	0.5
TG	101	36.75	950	5	130	280	0.5
TG	102	32.7	950	5	180	180	0.5
TG	103	32.7	900	5	170	190	0.5
TG	104	42.67	1000	5	130	320	0.5
TG	1	53.84	900	5	180	290	0.5
TG	5	43.9	900	5	180	240	0.5
TG	6	56.2	850	5	180	310	0.5
TG	11	59.4	950	5	180	320	0.5
TG	12	63.4	950	5	180	350	0.5
TG	13	47	800	5	180	260	0.5
TG	14	45.09	850	5	180	250	0.5
TG	16	47.37	950	5	180	260	0.5
TG	37	58.5	850	5	180	320	0.5
TG	40	68.32	850	5	180	370	0.5
TG	41	68.32	850	5	180	370	0.5
TG	54	54.87	1000	5	180	300	0.5
TG	61	58.56	950	5	180	320	0.5
TG	88	23.7	600	5	130	180	0.5
TG	89	23.7	600	5	130	180	0.5
TG	91	23.7	600	5	130	180	0.5
TG	93	23.7	600	5	130	180	0.5
TG	105	41.64	600	3	160	250	0.5
TG	106	31.71	600	3	150	210	0.5
TG	107	24.59	800	3	130	180	0.5
TG	108	31.71	600	3	150	210	0.5
TG	109	23.7	600	3	130	180	0.5
TG	110	23.7	600	3	130	180	0.5
TG	111	41.64	600	3	160	250	0.5
TG	18	48.56	950	5	180	260	0.5
TG	28	83.77	700	5	180	460	0.5
TG	33	72.01	850	5	180	400	0.5
TG	38	68.42	800	5	180	380	0.5
TG	47	38.31	1100	5	180	210	0.5
TG	48	42.9	900	5	180	230	0.5
TG	49	45.66	850	5	180	250	0.5
TG	51	61.55	800	5	180	340	0.5
TG	55	51	950	5	180	280	0.5
TG	59	34.2	1200	5	180	180	0.5
TG	60	31.28	1200	5	180	170	0.5
TG	62	86.39	950	5	180	470	0.5
TG	67	39.56	950	5	180	210	0.5
bt1	1	127.3	700	5	180	550	0.5
bt1	7	127.3	700	5	180	550	0.5
bt1	34	74.02	900	5	160	460	0.5
bt1	35	69.79	900	5	160	420	0.5
bt1	36	142.92	700	5	180	550	0.5
bt1	37	88.67	800	5	180	490	0.5
bt1	39	88.67	700	5	180	490	0.5
bt1	42	88.67	900	5	180	490	0.5
bt1	43	88.67	700	5	180	490	0.5
bt1	44	88.67	700	5	180	490	0.5
bt1	48	127.3	700	5	180	550	0.5
bt1	33	53.14	600	5	170	310	0.5
bt1	3	125.47	500	5	180	610	0.5
bt1	12	37.74	800	5	180	200	0.5
bt1	14	44.31	500	5	180	240	0.5
bt1	16	55.29	600	5	180	300	0.5
bt1	19	31.15	500	5	180	170	0.5
bt1	20	38.51	600	5	180	210	0.5
bt1	29	29.31	800	5	180	160	0.5
bt1	47	35.35	500	5	180	190	0.5
bt1	51	87.16	500	5	180	480	0.5
bt1	56	35.35	600	5	180	190	0.5
bt1	65	31.16	600	5	180	170	0.5
bt1	68	19.91	600	5	180	110	0.5
bt1	69	24.2	800	5	180	130	0.5
bt1	70	39.12	600	5	180	210	0.5
bt1	71	68.91	1100	5	180	380	0.5
bt1	72	73.05	500	5	180	400	0.5
TG	35	47.4	900	5	180	260	0.5
TG	36	63.31	900	5	180	350	0.5
TG	39	65.32	1150	5	180	360	0.5
TG	42	66.76	1200	5	180	370	0.5
TG	43	61.19	900	5	180	330	0.5
TG	44	49.28	950	5	180	270	0.5
TG	45	50.94	900	5	180	280	0.5
TG	46	52.49	1200	5	180	290	0.5
TG	50	54.22	950	5	150	300	0.5
TG	53	45.91	1200	5	180	250	0.5
TG	57	46.59	950	5	180	250	0.5
TG	64	40.44	950	5	180	220	0.5
TG	65	46.1	850	5	180	250	0.5
bt1	2	122.44	1000	5	180	610	0.5
bt1	3	122.44	1000	5	180	610	0.5
bt1	4	122.44	1100	5	180	610	0.5
bt1	5	138.81	1500	5	180	620	0.5
bt1	6	138.81	1500	5	180	620	0.5
bt1	8	115.6	1500	5	180	620	0.5
bt1	10	87.05	1500	5	170	510	0.5
bt1	11	91.19	1250	5	90	400	0.5
bt1	18	65.06	1500	5	180	610	0.5
bt1	23	122.44	900	5	180	610	0.5
bt1	24	105.5	1500	5	180	580	0.5
bt1	26	92.52	1500	5	180	510	0.5
bt1	27	122.44	1000	5	180	610	0.5
bt1	49	122.31	1500	5	180	620	0.5
bt1	50	112.63	1500	5	180	600	0.5
bt1	51	109.24	1500	5	170	510	0.5
bt1	52	122.44	1000	5	180	610	0.5
mean		59.3233	883.607	4.88525	173.689	319.754
